1 **Is photosynthetic enhancement sustained through three years of elevated**  
2 **CO<sub>2</sub> exposure in 175-year old *Quercus robur*?**

3

4 **Gardner A<sup>1,2</sup>, Ellsworth DS<sup>3</sup>, Crous KY<sup>3</sup>, Pritchard J<sup>1,2</sup>, MacKenzie AR<sup>1,4\*</sup>.**

5

6 \*Corresponding author: a.r.mackenzie@bham.ac.uk

7

8

9 <sup>1</sup> Birmingham Institute of Forest Research, University of Birmingham, Edgbaston, B15 2TT, England.

10 <sup>2</sup> School of Biological Sciences, University of Birmingham, Edgbaston, B15 2TT, England.

11 <sup>3</sup> Hawkesbury Institute for the Environment, Western Sydney University, Locked Bag 1797, Penrith  
12 NSW 2751, Australia.

13 <sup>4</sup> School of Geography, Earth & Environmental Sciences, University of Birmingham, Edgbaston, B15  
14 2TT, England.

15

16

17

18

19 **Keywords:**

20 CO<sub>2</sub> fertilisation of photosynthesis, Deciduous forest, downregulation, enriched CO<sub>2</sub>, Free-air CO<sub>2</sub>  
21 enrichment (FACE), photosynthetic capacity.

22

23

24

25 **Abstract**

26 Current carbon cycle models attribute rising atmospheric CO<sub>2</sub> as the major driver of the increased  
27 terrestrial carbon sink, but with substantial uncertainties. The photosynthetic response of trees to  
28 elevated atmospheric CO<sub>2</sub> is a necessary step, but not the only one, for sustaining the terrestrial  
29 carbon uptake, but can vary diurnally, seasonally and with duration of CO<sub>2</sub> exposure. Hence we  
30 sought to quantify the photosynthetic response of the canopy-dominant species, *Quercus robur*, in a  
31 mature deciduous forest to elevated CO<sub>2</sub> (eCO<sub>2</sub>) (+150 μmol mol<sup>-1</sup> CO<sub>2</sub>) over the first three years of a  
32 long-term free air CO<sub>2</sub> enrichment facility at the Birmingham Institute of Forest Research in central  
33 England (BIFoR FACE). Over three thousand measurements of leaf gas exchange and related  
34 biochemical parameters were conducted in the upper canopy to assess the diurnal and seasonal  
35 responses of photosynthesis during the 2<sup>nd</sup> and 3<sup>rd</sup> year of eCO<sub>2</sub> exposure. Measurements of  
36 photosynthetic capacity via biochemical parameters, derived from CO<sub>2</sub> response curves, ( $V_{cmax}$  and  
37  $J_{max}$ ) together with leaf nitrogen concentrations from the pre-treatment year to the 3<sup>rd</sup> year of eCO<sub>2</sub>  
38 exposure, were examined. We hypothesized an initial enhancement in light-saturated net  
39 photosynthetic rates ( $A_{sat}$ ) with CO<sub>2</sub> enrichment of ≈37% based on theory but also expected  
40 photosynthetic capacity would fall over the duration of the study. Over the three-year period,  $A_{sat}$  of  
41 upper-canopy leaves was  $33 \pm 8$  % higher (mean and standard error) in trees grown in eCO<sub>2</sub>  
42 compared with ambient CO<sub>2</sub> (aCO<sub>2</sub>), and photosynthetic enhancement decreased with decreasing  
43 light. There were no significant effects of CO<sub>2</sub> treatment on  $V_{cmax}$  or  $J_{max}$ , nor leaf nitrogen. Our  
44 results suggest that mature *Q. robur* may exhibit a sustained, positive response to eCO<sub>2</sub> without  
45 photosynthetic downregulation, suggesting that, with adequate nutrients, there will be sustained  
46 enhancement in C assimilated by these mature trees. Further research will be required to  
47 understand the location and role of the additionally assimilated carbon.

48

49

50

## 51 Introduction

52 Forest ecosystems cover about 30% of the Earth's land surface, representing ~50% of terrestrially  
53 stored carbon and account for close to 60% of total terrestrial CO<sub>2</sub> fluxes in the global carbon cycle  
54 (Luysaert et al., 2008; Pan et al., 2011). The continual rise in atmospheric CO<sub>2</sub>, overwhelmingly due  
55 to anthropogenic activity (Friedlingstein et al., 2019), increases the need to understand the  
56 terrestrial carbon feedbacks of forests in the global carbon cycle. As the foundational driver of the  
57 carbon cycle of forests (e.g. Bonan, 2008), the photosynthetic response to changing atmospheric CO<sub>2</sub>  
58 is a necessary process for forests to act as long-standing carbon stores with relatively long-lived  
59 carbon (C) pools such as wood (Körner, 2017) and soil (Ostle et al., 2009). The amount of forest C-  
60 uptake in the future, and subsequent C sequestration, will be crucial determinants of future  
61 atmospheric CO<sub>2</sub> concentrations. So, quantifying the photosynthetic response under elevated  
62 CO<sub>2</sub> (eCO<sub>2</sub>), especially for mature trees, is critical to understanding the carbon uptake of forests  
63 under changing atmospheric composition.

64 It has been widely observed that eCO<sub>2</sub> can have a stimulatory effect on plant photosynthesis, known  
65 as photosynthetic enhancement, at least in the short-term (weeks to months) with adequate  
66 nutrient and water availability permitting (Brodribb et al., 2020). Long-term (years to decades)  
67 photosynthetic responses to eCO<sub>2</sub> are less well understood and lower-than-expected responses have  
68 been observed (Ainsworth & Long, 2005; Ellsworth et al., 2017). Note that, even in studies that  
69 report sustained and/or strong stimulation of photosynthesis under eCO<sub>2</sub>, the additionally  
70 assimilated C does not necessarily translate into increased growth stimulation (Bader et al., 2013;  
71 Sigurdsson et al., 2013).

72 The photosynthetic process and photosynthetic response to eCO<sub>2</sub> is sensitive to changes in  
73 environmental variables such as temperature, light, water and availability of nutrients. For example,  
74 net photosynthesis ( $A_{net}$ ) is expected to increase with exposure to eCO<sub>2</sub>, with greatest  
75 photosynthetic enhancement expected at maximum photon flux density ( $Q$ ) if Rubisco carboxylation  
76 is limiting (Sage et al., 2008). Decreases in  $A_{net}$  have been commonly associated with limitations in

77 water and nutrient availability (Ainsworth & Rogers, 2007; Nowak et al., 2004). For example, water  
78 availability has been found to increase the magnitude of eCO<sub>2</sub>-induced photosynthetic enhancement  
79 in drier years (Ellsworth et al., 2012; Nowak et al., 2004). Thus, interannual differences in eCO<sub>2</sub>-  
80 induced photosynthetic enhancement are to be expected as environmental conditions vary.

81 Understanding the photosynthetic response to eCO<sub>2</sub> under different, real-world, environmental  
82 conditions provides information essential, but not in itself sufficient, for modelling forest  
83 productivity (Jiang et al., 2020), and predicting carbon-climate feedbacks (e.g., Cox et al., 2013; Jones  
84 et al., 2016).

85 Despite a significant body of research on the photosynthetic response to eCO<sub>2</sub> in tree seedlings and  
86 saplings (as reviewed in Ainsworth & Long, 2005; Medlyn et al., 1999), fewer studies address the  
87 long-term (> 1 year) photosynthetic responses in mature plantation trees (Crous et al., 2008;  
88 Liberloo et al., 2007; Uddling et al., 2009; Warren et al., 2015) and very few in mature forest-grown  
89 trees (Bader et al., 2010; Ellsworth et al., 2017; Klein et al., 2016). Currently, the dynamic vegetation  
90 components of Earth System models, which diagnose vegetation responses to environmental  
91 change, have commonly been constructed using data from eCO<sub>2</sub> experiments on young and/or  
92 plantation grown trees (Piao et al., 2013). Yet, it is difficult to compare, generalise, and scale results  
93 from young trees in their exponential growth phase to the response of closed-canopy mature forests  
94 (Norby et al., 2016). For example, previous work from a long-term natural experiment found CO<sub>2</sub>  
95 stimulation declined with tree age in *Quercus ilex* (Hättenschwiler et al., 1997). Therefore, it is  
96 plausible that model projections are currently overestimating the photosynthetic responses of  
97 mature forests and, thence, the 'CO<sub>2</sub> fertilisation' effect (Zhu et al., 2016). Consequently, uncertainty  
98 remains as to the magnitude of, and environmental constraints on, photosynthetic enhancement  
99 under eCO<sub>2</sub> in large, long standing carbon stores such as mature forests (Jiang et al., 2020; Norby et  
100 al., 2016).

101 Free-air CO<sub>2</sub> enrichment (FACE) facilities are valuable to understand system-level responses to eCO<sub>2</sub>  
102 (Ainsworth & Long, 2005; Terrer et al., 2019) particularly in forests (Medlyn et al., 2015; Norby et

103 al., 2016). The development of 2<sup>nd</sup> generation forest FACE experiments focuses on tall, mature trees  
104 grown in their own forest soil (Hart et al., 2020). To date, forest FACE experiments have observed  
105 photosynthetic enhancements ranging from 30-60%, depending on tree species and environmental  
106 factors (as reviewed in Ainsworth & Rogers, 2007; Nowak et al., 2004). Of the few studies on closed-  
107 canopy dominant tree species, smaller photosynthetic enhancement to eCO<sub>2</sub> have been observed  
108 (19 to 49%) than in studies conducted on younger trees (Crous et al., 2008; Liberloo et al., 2007;  
109 Sholtis et al., 2004), but the reasons behind this smaller response remain unclear.

110 There is evidence of a reduction in photosynthetic activity after long-term eCO<sub>2</sub> exposure, known as  
111 photosynthetic downregulation (Ainsworth et al., 2004; Crous & Ellsworth, 2004), but  
112 downregulation is not always observed (Curtis & Wang, 1998; Herrick & Thomas, 2001). Commonly  
113 photosynthetic downregulation under eCO<sub>2</sub> exposure is the result of decreases, either directly or  
114 indirectly, in Rubisco carboxylation ( $V_{cmax}$ ) (Feng et al., 2015; Wujeska-Klaue et al., 2019b).

115 However, the stimulatory effect of photosynthesis under eCO<sub>2</sub> may be reduced but is usually not  
116 completely removed (Leakey et al., 2009; Wujeska-Klaue et al., 2019). Photosynthetic  
117 downregulation has largely been observed in young plants (Leakey et al., 2009), with some  
118 downregulation observed in two aggrading plantation forests (Crous et al., 2008; Warren et al.,  
119 2015), commonly as a result of insufficient soil nitrogen supply (Luo et al., 2004). However,  
120 photosynthetic downregulation has largely not been observed in mature forests (Bader et al., 2010)  
121 and therefore open questions remain concerning the frequency and magnitude of photosynthetic  
122 downregulation under eCO<sub>2</sub> exposure in mature forests.

123 To understand the photosynthetic responses in mature temperate deciduous forests, we evaluated  
124 the photosynthetic enhancement and potential downregulation in ca. 175-year old canopy dominant  
125 trees of *Quercus robur* L. exposed to elevated CO<sub>2</sub> for three years. Considering that forest FACE  
126 experiments aim to operate for 10 years or more, we refer to these CO<sub>2</sub> responses as ‘early’ (Griffin  
127 et al., 2000). This study is amongst the oldest trees that have ever been examined under elevated  
128 CO<sub>2</sub>. To assess the photosynthetic enhancement of the trees on daily and interannual timeframes,

129 measurements of gas exchange and leaf biochemistry were measured in the upper oak canopy over  
130 four growing seasons, that included one pre-treatment year (2015) and three treatment years (2016  
131 to 2019). Our aims were to quantify the photosynthetic response to eCO<sub>2</sub> (i.e., ambient +150 μmol  
132 mol<sup>-1</sup>) for mature *Q. robur* and how light level influences this response, to determine whether  
133 photosynthetic downregulation under eCO<sub>2</sub> occurred and to establish whether the relationship  
134 between leaf N and photosynthetic capacity changed in eCO<sub>2</sub>. We hypothesized that net  
135 photosynthetic gas exchange, A<sub>net</sub>, will significantly increase with eCO<sub>2</sub> and light levels (Q). The  
136 greatest enhancement was expected with the highest light levels, as a result of reduced limitations  
137 in the light dependent reaction of photosynthesis, and that photosynthetic enhancement would be  
138 ≈37% following theory and reasoning in Nowak et al. (2004)(see also Supplemental Appendix 1.  
139 below). We also hypothesized that leaf nitrogen (N) will be reduced under elevated CO<sub>2</sub> and that  
140 photosynthetic downregulation will be observed under eCO<sub>2</sub> as a result of reduced leaf N and/or a  
141 decline in either the maximum rate of photosynthetic Rubisco carboxylation ( $V_{max}$ , μmol m<sup>-2</sup> s<sup>-1</sup>);  
142 and the maximum rate of photosynthetic electron transport ( $J_{max}$ , μmol m<sup>-2</sup> s<sup>-1</sup>), or both (Griffin et  
143 al., 2000).

## 144 **Methods and materials**

### 145 *Site description*

146 This study was conducted at the Birmingham Institute of Forest Research (BIFoR) Free Air CO<sub>2</sub>  
147 Enrichment (FACE) facility located in Staffordshire (52.801°N, 2.301°W), United Kingdom. The BIFoR  
148 FACE facility is a '2<sup>nd</sup> generation' Forest FACE facility, extending the scope of 1<sup>st</sup> generation facilities;  
149 (see Norby et al., 2016), situated within 19 ha of mature northern temperate broadleaf deciduous  
150 woodland having a canopy height of 24-26 m. The woodland consists of an overstorey canopy  
151 dominated by English oak (*Quercus robur* L.) and a dense understorey comprising mostly of hazel  
152 coppice (*Corylus avellana* L.), sycamore (*Acer pseudoplatanus* L.), and hawthorn (*Crataegus*  
153 *monogyna* Jacq.). *Q. robur* (commonly known as pendunculate oak, European oak or English oak) is a

154 common broadleaf species geographically widespread across Europe where it is both economically  
155 important and ecologically significant for many biota (Eaton et al., 2016; Mölder et al., 2019). The  
156 site was planted with the existing oak standards in the late 1840s and has been largely unmanaged  
157 for the past 30 to 40 years. Like most established forest of the temperate zone, the BIFoR FACE  
158 forest is under-managed.

159 The study site is situated within the temperature-rainfall climate space occupied by temperate forest  
160 (Jiang et al., 2020; Sommerfeld et al., 2018) and is characterized by cool wet winters and warm dry  
161 summers with a frost-free growing season from April to October. The mean January and July  
162 temperatures were 4 and 17 °C, respectively, and the average annual precipitation for the region is  
163 720 mm (650 mm, 669 mm, 646 mm and 818 mm, in 2015, 2017, 2018 and 2019, respectively, when  
164 the study was conducted; see Figure 1.). The total N deposition load at the BIFoR FACE site is ~22 Kg  
165 N/ha/year (estimate provided by S. Tomlinson at the Centre for Ecology and Hydrology, Edinburgh,  
166 UK)(Mackenzie et al., 2021), representing around 15% of the total nitrogen nutrition of temperate  
167 deciduous trees (Rennenberg & Dannenmann, 2015).

168 BIFoR FACE consists of nine approximately circular experimental plots of woodland 30 m in diameter  
169 (Hart et al., 2020). Only the six plots with infrastructure were considered in the present study. Each  
170 ‘infrastructure plot’ is encircled by steel towers constructed individually to reach 2 m above the local  
171 canopy-top height. The facility uses a paired-plot design (Hart et al., 2020): three replicate plots at  
172 either ambient CO<sub>2</sub> (aCO<sub>2</sub>) (ca. 405 μmol mol<sup>-1</sup>) and three plots supplied with CO<sub>2</sub> enriched air,  
173 termed elevated CO<sub>2</sub> plots (eCO<sub>2</sub>). The latter plots were operated such that they achieved a target of  
174 +150 μmol mol<sup>-1</sup> above the minimum measured in the ambient plots (i.e. concentrations in the  
175 elevated plots ca. 555 μmol mol<sup>-1</sup>) as five-minute rolling averages (Hart et al., 2020)(Supplementary  
176 Figure 1). Elevated CO<sub>2</sub> is added from dawn (solar zenith angle, *sza* = -6.5°) to dusk (*sza* = -6.5°)  
177 throughout the growing season. Daytime exposure to eCO<sub>2</sub> was almost continuous throughout the  
178 growing season (Hart et al., 2020), with exceptions if the 15-minute average wind speed was greater  
179 than 8 m s<sup>-1</sup>, or when canopy-top, 1-min average, air temperature was < 4°C. In the latter case, gas

180 release was resumed when the air temperature was  $\geq 5^{\circ}\text{C}$ . The  $\text{CO}_2$  fumigation thresholds for wind  
181 speed and temperature were selected because of the high cost of maintaining elevated  $\text{CO}_2$  and the  
182 insignificant uptake of carbon under these conditions, respectively. The operation of the FACE  
183 system and statistical performance in terms of meeting the target  $\text{CO}_2$  concentration in time and  
184 space have been described in Hart et al. (2020).

185 In each plot, canopy access was gained through a custom-built canopy access system (CAS) (Total  
186 Access Ltd., UK) that was installed from the central towers with canopy measurements made from a  
187 rigged rope access system (Supplementary Figure 2.). This facilitated *in situ* gas exchange  
188 measurements by allowing access to the upper oak canopy. The hoisting system comprises of an  
189 electric winch (Harken Power Seat Compact) that lifts a harnessed (Petzl AVAO BOD 5 point harness)  
190 user vertically through the air at a predetermined fixed point to a maximum canopy height of 25 m.  
191 The system required operation from the ground by trained staff and the user is seated in a  
192 Boatswain's chair. One oak tree per plot was accessible using the CAS system as set up during this  
193 study, and all gas exchange measurements were made on unshaded leaves within the top two  
194 meters of each tree canopy on dominant trees.

195 For this study, the sample size used throughout the study ( $n=3$ ) represents the number of replicate  
196 experimental plots at BIFoR FACE and includes within-tree replicates that were averaged per plot  
197 before analysis. All the three replicates were sampled for the majority of campaigns, except for  
198 September 2018 and June 2019 where replicates were reduced to two due to logistic constraints,  
199 weather, and safe tree access.

#### 200 *Gas exchange measurements*

201 All gas exchange measurements were conducted *in situ* on upper canopy oak leaves using either a Li-  
202 6400XT or Li-6800 portable photosynthesis system (LicOR, Lincoln, NE, USA) to quantify  
203 photosynthetic performance at BIFoR FACE. Measurement campaigns focussed on two different  
204 types of measurements: i) instantaneous diurnal measurements, at prevailing environmental



205 conditions (2018 and 2019), and ii) net assimilation rate-intercellular CO<sub>2</sub> concentration (A-C<sub>i</sub>)  
206 measurements (includes pre-treatment, 2015; 1<sup>st</sup> year, 2017; and 3<sup>rd</sup> year, 2019, of CO<sub>2</sub> fumigation).  
207 Measurements were conducted in all six experimental plots with infrastructure, on one chosen  
208 candidate tree per plot. The target tree remained the same for all treatment years (2017, 2018 and  
209 2019) but a different tree was measured during the pre-treatment period in 2015. This change was  
210 because the plot infrastructure, which determined the CAS system, was not constructed until 2016.  
211 When reporting treatment effects from the present study, we report the *mean enhancement* or  
212 *treatment effect*:

$$100 \cdot \frac{\Delta A_i}{A_{i,a}} = 100 \left( \frac{A_{i,e} - A_{i,a}}{A_{i,a}} \right) \quad [1]$$

213 where  $A_{i,x}$  is a measure of gas exchange ( $i = \text{'net' or 'sat'}$ , see below) at ambient (a) or elevated (e)  
214 CO<sub>2</sub> mixing ratios. When comparing our results with other studies using different eCO<sub>2</sub> treatments,  
215 we report the sensitivity to eCO<sub>2</sub>, following Keenan et al. (2016):

$$\text{Sensitivity} = \frac{c_a}{GPP} \frac{\partial GPP}{\partial c_a} \approx \frac{\Delta A_i}{A_{i,a}} \cdot \frac{c_a}{\Delta c_a} \quad [2]$$

216 where  $c_a$  is the ambient CO<sub>2</sub> mixing ratio and  $\Delta c_a$  is the treatment size (e.g. +150 μmol mol<sup>-1</sup> as in our  
217 case). For the conditions of the present study (see 'Diurnal measurements' section, below),  $c_a/\Delta c_a =$   
218  $392/150 = 2.61$ , and we use net photosynthesis instead of GPP. Hence, our theoretical predicted  
219 photosynthetic enhancement (Nowak et al., 2004; Supplemental Appendix 1.) for the + 150 μmol  
220 mol<sup>-1</sup> increase in CO<sub>2</sub> (i.e., ≈37%; ; Hart et al. (2020)), is equivalent to expecting a sensitivity to eCO<sub>2</sub>  
221 of unity.

## 222 Diurnal measurements

223 Near the canopy top, *in situ* diurnal measurements of gas exchange were conducted on upper  
224 canopy oak leaves on 11 and 12 separate summer days of 2018 and 2019, respectively.

225 Measurements of gas exchange (e.g. net CO<sub>2</sub> photosynthetic assimilation rates, A<sub>net</sub>) were made  
226 using a Li-6800 equipped with the default clear Propafilm (Innovia Films Inc., Atlanta, GA) window  
227 chamber head, which allowed for natural sunlight to illuminate the leaf. Measurements were  
228 conducted in one pair of plots (i.e. one eCO<sub>2</sub> plot and its paired aCO<sub>2</sub> plot) on each sampling day.  
229 Therefore, each full campaign (n=3) took three days to complete, with the exception of September  
230 2018 and June 2019 where only two replicate plots could be measured. A total of four diurnal  
231 campaigns were conducted in both 2018 and 2019, providing a total of 3,426 data points. Five to six  
232 healthy leaves were randomly selected in the same oak tree per plot, every 30-40 minutes across the  
233 time course of the day for gas exchange measurements, swapping between aCO<sub>2</sub> and eCO<sub>2</sub> plots.  
234 Measurements were made at the respective growth CO<sub>2</sub> of aCO<sub>2</sub> (~405 μmol mol<sup>-1</sup>) or +150 μmol  
235 mol<sup>-1</sup> aCO<sub>2</sub> (~555 μmol mol<sup>-1</sup>) for eCO<sub>2</sub> plots, along with other environmental variables such as  
236 relative humidity (RH); air temperature (T<sub>air</sub>); and quanta of photosynthetically active radiation  
237 (PAR). Measurements were confined to the youngest fully expanded leaves of the leader branch  
238 within reaching distance of the CAS system. Measurements were confined to the first flush of leaves  
239 across the season for consistency in leaf age. Expanding leaves, judged from colour and texture,  
240 were avoided for measurements, as they had not matured in terms of chlorophyll and formation of  
241 the photosynthetic apparatus. Once a leaf was inside the chamber, the Li-6800 head was gently  
242 positioned and held constant at an angle towards the sun. This was to ensure sun exposure on the  
243 leaf, to minimize shading of the chamber head on the measured leaf and to reduce variation across  
244 the leaf measurements. Measurements were recorded after an initial stabilisation period (typically  
245 ~40 seconds to 1 minute), to meet programmed stability parameters. This allowed for instantaneous  
246 steady-state photosynthesis to be captured, yet avoided chamber-related increases in leaf  
247 temperature (Parsons et al., 1998). Care was taken to ensure conditions matched those outside the  
248 chamber before each measurement was taken. The daily mean RH inside the leaf chamber was  
249 between 50% and 77% for all measurements. The mean C<sub>a</sub> values in the LiCOR chamber head were  
250 390 ± 0.9 μmol mol<sup>-1</sup> and 538 ± 2.7 μmol mol<sup>-1</sup>, in 2018, and 393 ± 1.0 μmol mol<sup>-1</sup> and 545 ± 4.8

251  $\mu\text{mol mol}^{-1}$ , in 2019, for aCO<sub>2</sub> and eCO<sub>2</sub> respectively. The mean CO<sub>2</sub> treatments were, therefore,  
252  $+148 \pm 2.8 \mu\text{mol mol}^{-1}$  in 2018, and  $+152 \pm 4.9$  in 2019, and were not statistically different. The gas  
253 exchange systems were calibrated before each growing season.

#### 254 A-C<sub>i</sub> curves

255 A-C<sub>i</sub> curves were conducted in three growing seasons: pre-treatment year (2015), in the first year of  
256 CO<sub>2</sub> fumigation (2017) and third year of CO<sub>2</sub> fumigation (2019). Measurements were either  
257 conducted on attached branches *in situ* (2015 and 2019) or on detached branches harvested by  
258 climbers (2017) using a portable open gas exchange system that incorporated a controlled  
259 environment leaf chamber (Li-6400XT and LI-6800, LICOR, Inc., Lincoln, NE, USA). Detached branches  
260 were transferred to researchers on the ground immediately after excision, where they were placed  
261 in a bucket of water to minimize desiccation. Branches were re-cut under water and allowed to  
262 stabilize, before starting measurements. Measurement on detached branches were conducted no  
263 longer than 45 minutes after collection. Previous studies investigating measurements of gas  
264 exchange on severed or attached branches found no significant differences between the two  
265 methods (Bader et al., 2016; Verryckt et al., 2020). A-C<sub>i</sub> curves were measured at a Q of  
266  $1800 \mu\text{mol m}^{-2} \text{s}^{-1}$  (in 2015 and 2019) or  $1200 \mu\text{mol m}^{-2} \text{s}^{-1}$  (in 2017) and at a leaf temperature of  
267 25 °C. Before each curve, a stabilisation period of between 5 to 10 minutes was used depending on  
268 the prevailing environmental conditions and each curve took an average of 40 minutes. Light-  
269 saturated net photosynthesis ( $A_{\text{sat}}$ ) were estimated from A-C<sub>i</sub> curves at growth [CO<sub>2</sub>]. The  
270 CO<sub>2</sub> concentrations were changed in 12 to 14 steps starting at the respective growth [CO<sub>2</sub>]; every  
271  $100 \mu\text{mol mol}^{-1}$  down to  $50 \mu\text{mol mol}^{-1}$  (near the photosynthetic CO<sub>2</sub> compensation point), then  
272 increasing to  $1800 \mu\text{mol mol}^{-1}$  in roughly  $200 \mu\text{mol mol}^{-1}$  increment steps. Five to six replicate A-C<sub>i</sub>  
273 curves on different leaves per CO<sub>2</sub> treatment were measured per day. Measurements were taken  
274 between 09:00 and 11:00, and 14:00 and 17:00 to avoid potential midday stomatal closure (Valentini

275 et al., 1995). Measurements were made using the treatment pair arrangement of one aCO<sub>2</sub> and one  
276 eCO<sub>2</sub> plot per day (n=3).

### 277 *Leaf carbon and nitrogen*

278 Oak leaves were collected from the top of the canopy in each month, May to November in 2015 and  
279 2019, by arborist climbers, and stored immediately at -25 °C. Two upper canopy leaves, from one  
280 tree per plot, were selected for elemental analyses, these trees corresponded to the measurement  
281 tree for leaf gas exchange. Each leaf was photographed on white graph paper, with a ruler for  
282 reference. Leaf area analysis was conducted using imaging software Image J (IMAGE J v1.53,  
283 National Institutes of Health, Bethesda, MD, USA) and the fresh weight was recorded. Each leaf was  
284 oven dried at 70 °C for at least 72 hours, re-weighed for dry weight and the leaf mass per unit area  
285 was calculated. Dried leaf fragments were ground and each sample (~2 mg) was enclosed in a tin  
286 capsule. Samples were analysed for  $\delta^{13}\text{C}$ , total C, and total N using an elemental analyser interfaced  
287 with an isotope ratio mass spectrometer (Sercon Ltd., Cheshire, UK).

### 288 *Statistical analysis*

289 All statistical analysis were performed in R version 4.0.3 (R Core Team, 2020). Before statistical  
290 analysis, all data were checked for normality by inspection of the Q-Q plots and Levene's test, and  
291 residuals from model fitting were checked for evidence of heteroscedasticity. Hourly averages of  
292 diurnal measurements were analysed using a linear mixed effects model (*'lmer'* package). Fixed  
293 categorical factors in this model were CO<sub>2</sub> treatment (i.e., aCO<sub>2</sub> or eCO<sub>2</sub>), sampling month and  
294 sampling year (i.e. 2018 or 2019), in addition to their interactions. Additionally, 'time of day' and  
295 'plot' were represented as random factors, the latter as individual trees were nested within each  
296 experimental plot. Type III F-statistics associated with the mixed model analysis (repeated-measures  
297 analysis of variance (ANOVA)) were reported. Statistically significant CO<sub>2</sub> treatment differences  
298 among groups were further tested with Tukey's post hoc test using the R package 'emmeans' ( $P <$   
299 0.05 reported as significant). To investigate the dependence of photosynthetic enhancement with

300 variation of light, the diurnal gas exchange data, with leaf temperature,  $T_{\text{leaf}} > 18$  °C, and vapour  
301 pressure deficit ( $D$ ),  $D < 2.2$  kPa, were sub-divided into four light ( $Q$ ) categories, each sampled about  
302 equally. The  $Q$  classes were chosen based on the characteristic response of  $A_{\text{net}}$  to light as follows:  
303  $Q < 250$ ;  $250 \leq Q < 500$ ;  $500 \leq Q < 1000$ ; and  $Q \geq 1000$   $\mu\text{mol m}^{-2} \text{s}^{-1}$ .  $\text{CO}_2$  treatment, year, and  $Q$   
304 category were then used as parameters in the ANOVA.

305 The photosynthetic  $\text{CO}_2$  response ( $A-C_i$ ) curves were fit with the model of Farquhar et al. (1980) to  
306 estimate the apparent maximum rate of photosynthetic Rubisco carboxylation ( $V_{\text{cmax}}$ ,  $\mu\text{mol m}^{-2} \text{s}^{-1}$ )  
307 and the apparent maximum rate of photosynthetic electron transport ( $J_{\text{max}}$ ,  $\mu\text{mol m}^{-2} \text{s}^{-1}$ )  
308 using '*Plantecophys*' package in R (Duursma, 2015). The model-fitting was undertaken to provide  
309 insight into photosynthetic capacity and its response to long-term exposure to elevated [ $\text{CO}_2$ ]  
310 (Rogers & Ellsworth, 2002). We tested for outliers by examining the  $J_{\text{max}}/V_{\text{cmax}}$  ratio, RMSE values and  
311 standard errors (SE) for fits of  $J_{\text{max}}$  and  $V_{\text{cmax}}$ , all of which indicate violations to the theory for fitting  
312 these curves (Sharkey et al., 2007). Visual inspection of each  $A-C_i$  curve with outliers allowed us to  
313 identify any incomplete curves and/or mechanical failures and those curves were subsequently  
314 removed. This accounted for  $< 10\%$  of the data, leaving a total of 86  $A-C_i$  curves across the three  
315 sampling years in the analysis.

## 316 **Results**

### 317 *Measurement conditions*

318 Overall, diurnal measurements were conducted on dry, sunny days (Fig. 1), and environmental  
319 conditions ( $Q$  and  $T_{\text{leaf}}$ ) were consistent between  $a\text{CO}_2$  and  $e\text{CO}_2$  across the two growing seasons of  
320 diurnal measurements (Figs. 2A, B and 3A, B).  $Q$  levels were largely comparable between  $\text{CO}_2$   
321 treatments although cloud and temperature conditions were more variable among sampling days  
322 and campaigns in 2018 than in 2019.

323 Leaf temperature was more stable than  $Q$  with lower variability across the diurnal sampling, high  
324 similarity between sampling days, and high consistency between  $\text{CO}_2$  treatments. There were

325 differences of up to 15 °C in midday measurements of  $T_{\text{leaf}}$ , between months, suggesting a seasonal  
326 influence as would be expected from the site's mid-latitude location, with differences more  
327 prominent in 2019 than 2018. The highest  $T_{\text{leaf}}$  values were observed in July with a common seasonal  
328 decline after this campaign.

329 Analysis of the diurnal dataset showed the range of mean daily  $A_{\text{net}}$  was similar between years,  
330 however the highest mean daily  $A_{\text{net}}$  ( $12.2 \mu\text{mol m}^{-2} \text{s}^{-1}$ ) was reported in 2018. Contrasting seasonal  
331 patterns were observed between the sampling years of 2018 and 2019, with decreases in mean daily  
332  $A_{\text{net}}$  across the growing season observed in 2018 compared to increases in  $A_{\text{net}}$  in 2019. In both  
333 sampling years, we observed a significant enhancement of  $A_{\text{net}}$  when exposed to  $e\text{CO}_2$  ( $P < 0.05$ ,  
334 Table 1 and Figs. 2 and 3). Here, we did not observe any significant effect of either season or  
335 sampling year on  $A_{\text{net}}$  (Table 1.). Therefore, from measurements of  $A_{\text{net}}$  collected from the diurnal  
336 dataset, a mean  $e\text{CO}_2$ -driven photosynthetic enhancement (i.e.,  $100 \cdot \Delta A_i / A_{i,a}$ ) of  $23 \pm 4\%$  was  
337 observed across the 2-year period of this study.

### 338 *Photosynthesis and variation in photon flux density (Q)*

339 This study analysed the role of measurement  $Q$  affecting  $A_{\text{net}}$  and its response to  $e\text{CO}_2$  in separate  
340 growing seasons to investigate photosynthetic enhancement values at different light conditions. In  
341 each light category (see Methods, above), the light conditions between the  $\text{CO}_2$  treatments were  
342 statistically comparable (Figure 4, Supplementary table 1: S1). Mean, median, and interquartile  
343 range of  $A_{\text{net}}$  increased with increasing  $Q$  class for both sampling years and  $\text{CO}_2$  treatments (Fig. 4A,  
344 Table 2). We observed no significant effect of year for  $A_{\text{net}}$  in this study, but we did observe a larger  
345 variation in  $A_{\text{net}}$  in 2019, when compared to 2018 (Table 2, Fig. 4A). Values of mean  $A_{\text{net}}$  ranged from  
346  $4.6 \pm 0.3 \mu\text{mol m}^{-2} \text{s}^{-1}$ , at the lowest  $Q$  level with a mean of  $150 \mu\text{mol m}^{-2} \text{s}^{-1}$ , to  $11.5 \pm 0.7 \mu\text{mol m}^{-2}$   
347  $\text{s}^{-1}$  at highest  $Q$  (mean  $Q$  of  $1360 \mu\text{mol m}^{-2} \text{s}^{-1}$ ). Additionally, in both sampling years  $A_{\text{net}}$  was  
348 significantly higher under  $e\text{CO}_2$  conditions when compared to  $a\text{CO}_2$  ( $P < 0.05$ , Table 2, Fig. 4A).

349 Consistent with our hypothesis, we observed mean eCO<sub>2</sub>-driven photosynthetic enhancement to  
350 increase with increasing *Q*, with the largest enhancement observed at highest *Q* in both sampling  
351 years, 30 ± 9%, and 35 ± 13%, for 2018 and 2019 respectively (Fig. 4B). In 2018, eCO<sub>2</sub>-driven  
352 photosynthetic enhancement ranged from 7 ± 10%, in the lowest *Q* class, to 30 ± 9%, in the highest  
353 *Q* class (Fig. 4B). A similar positive relationship between eCO<sub>2</sub>-driven photosynthetic enhancement  
354 and *Q* was present in 2019 with enhancement ranging from 11 ± 6%, in the lowest *Q* class, to 35 ±  
355 13%, in the highest *Q* class (Fig. 4, B). There was no significant effect of year (Table 2) and therefore  
356 the mean eCO<sub>2</sub>-driven photosynthetic enhancement at light saturation (i.e. in the highest *Q* class)  
357 was on average 33 ± 8 % across the two sampling years. Our results report that the mean eCO<sub>2</sub>-  
358 driven photosynthetic enhancement of light-saturated *A*<sub>net</sub> (*A*<sub>sat</sub>) in both sampling years was  
359 consistent, within error (using 95 % confidence intervals), of the theoretical predicted enhancement  
360 based on proportion of CO<sub>2</sub> increase (≈37 ± 6%), indicating a sensitivity to eCO<sub>2</sub> (equation 2, above)  
361 of close to unity for *A*<sub>sat</sub>.

### 362 *Photosynthetic capacity and foliar nitrogen*

363 The seasonal and interannual biochemical changes in *Q. robur* were assessed via differences in leaf  
364 apparent maximum CO<sub>2</sub> carboxylation capacity (*V*<sub>cmax</sub>) and apparent maximum electron transport  
365 capacity for RuBP regeneration (*J*<sub>max</sub>) (Fig. 5.) to assess the photosynthetic capacity in the initial years  
366 of the long-term experiment. Initially, we tested for differences between the year of sampling and  
367 found no statistical difference of either *V*<sub>cmax</sub> or *J*<sub>max</sub> between the three sampling years (2015, 2017  
368 and 2019) (Fig. 5, Supplementary table 2: S2). This study found no significant effects of CO<sub>2</sub>  
369 enrichment on *V*<sub>cmax</sub> or *J*<sub>max</sub> across the two years of CO<sub>2</sub> enrichment, i.e. the 1<sup>st</sup> and 3<sup>rd</sup> years, and no  
370 significant effect of season between the three measurement years (Fig. 5, Table 3.). However, this  
371 study did observe a significant effect of month for the variable *V*<sub>cmax</sub> in 2019, whereby an increase in  
372 *V*<sub>cmax</sub> was observed with progression of the growing season (Fig. 5A, Table 3.). Thus, this study

373 observed no statistical evidence to suggest photosynthetic down-regulation of either  $V_{\text{cmax}}$  or  $J_{\text{max}}$   
374 under elevated  $\text{CO}_2$  across the three years of  $\text{eCO}_2$  exposure in *Q. robur*.

375 Consistent with previous research, this study observed a strong positive linear relationship between  
376  $J_{\text{max}}$  and  $V_{\text{cmax}}$ , which remained unchanged across  $\text{CO}_2$  treatments and growing season ( $r^2 = 0.75$   
377 ambient;  $r^2 = 0.71$  elevated) (Supplementary Figure 3.). Additionally, no  $\text{eCO}_2$ -induced decreases in  
378 either area-based foliar nitrogen ( $N_a$ ) or mass-based foliar nitrogen ( $N_m$ ) were observed (Fig. 5; C and  
379 D, Table 3.) across the study period. No change in foliar nitrogen is corroborative of the results in Fig.  
380 5 and also suggest the absence of photosynthetic downregulation under  $\text{eCO}_2$  in mature *Q. robur* in  
381 the first three years of the long-term experiment.

382 The instantaneous response ratio (2015) and the longer-term response ratio (2017 and 2019) were  
383 calculated using the light-saturated  $A_{\text{net}}$  (i.e.,  $A_{\text{sat}}$ ) values at growth  $\text{CO}_2$  from the  $A-C_i$  datasets (Fig.  
384 6B). There was no significant difference between the measurement year in either  $A_{\text{sat}}$  or the  
385 response ratio suggesting comparability between the instantaneous response ratio and the longer-  
386 term response ratio (Supplementary table 3: S3). A significant treatment effect was observed for  $A_{\text{sat}}$   
387 (Fig. 6A, Table 3.) in all three sampling years, with a mean  $\text{eCO}_2$ -driven photosynthetic enhancement  
388 of  $24 \pm 2\%$ ,  $31 \pm 7\%$  and  $32 \pm 11\%$  in 2015, 2017 and 2019, respectively, under elevated  $\text{CO}_2$  when  
389 compared to  $\text{aCO}_2$ . A significant effect of month on  $A_{\text{sat}}$  was observed in 2019, with  $A_{\text{sat}}$  increasing  
390 with the progression of the growing season (Table 3, Fig. 6A). The photosynthetic enhancement  
391 observed from our  $A-C_i$  curve datasets are consistent with the values obtained in the diurnal dataset  
392 ( $33 \pm 8\%$ , Fig. 5) but is lower than the theoretical predicted enhancement calculated via  $\text{CO}_2$  increase  
393 ( $37\%$ ) (Supplemental Appendix 1.). In summary, the consistency in the two separate measurements  
394 (i.e. diurnal and  $A-C_i$  curves) support the finding of sustained  $\text{eCO}_2$ -driven photosynthetic  
395 enhancement in mature *Q. robur* across the first three years of the BIFoR FACE experiment.

## 396 Discussion



397 There is ample data on the short-term enhancement of photosynthesis by eCO<sub>2</sub> in young trees using  
398 a variety of experimental set-ups from tree chambers to FACE experiments (e.g. Ainsworth & Rogers,  
399 2007, Crous et al. 2013), but few data for mature forest-grown trees with multi-year CO<sub>2</sub> exposure in  
400 a FACE setting. For mature trees, available evidence suggests that there are significant increases in  
401 light-saturated A<sub>net</sub> (Ellsworth et al., 2017; Körner et al., 2005) but there have been mixed results  
402 regarding the magnitude of photosynthetic enhancement (range 13-49% per 100 ppm of CO<sub>2</sub>  
403 increase) and occurrence of photosynthetic downregulation in mature forest-grown trees (Bader et  
404 al., 2010, 2016; Crous et al., 2008; Ellsworth et al., 2017; Warren et al., 2015). In this study, we  
405 predicted a theoretical A<sub>net</sub> enhancement of 37% for the 150 μmol mol<sup>-1</sup> increase in CO<sub>2</sub> at BIFoR  
406 FACE following reasoning in Nowak et al. (2004) (Supplemental Appendix 1). After three years of  
407 eCO<sub>2</sub> exposure in mature temperate oak forest, net photosynthetic rates of upper canopy foliage  
408 from *Q. robur* were on average 23 ± 4% higher, based on the diurnal dataset, in the trees exposed to  
409 elevated CO<sub>2</sub> when compared to control plots (Figs. 2, 3 and 4; Tables 1 and 3). The eCO<sub>2</sub>-driven  
410 photosynthetic enhancement observed is substantially lower than the theoretical expected  
411 enhancement of 37%, likely due to diurnal and seasonal variation in prevailing environmental  
412 conditions such as lower air temperatures, lower light conditions, and varying vapour pressure  
413 deficits. Only considering light-saturated A<sub>net</sub> (A<sub>sat</sub>) from the diurnal dataset, our mean  
414 photosynthetic enhancement is greater than the average diurnal enhancement, at 33 ± 8% rather  
415 than 23%. Furthermore, our independent estimate of A<sub>sat</sub> enhancement based on the A-C<sub>i</sub> curve  
416 data is 32 ± 11%, which is comparable within error (using 95% confidence intervals) to both the A<sub>sat</sub>  
417 value from the diurnal measurements and the hypothesized enhancement of 37%. A slight stomatal  
418 closure in eCO<sub>2</sub> could have contributed to the slightly lower photosynthetic enhancement than the  
419 hypothesized enhancement of 37% (See Supplemental Appendix 1). However, our average light-  
420 saturated photosynthetic enhancement is generally lower than previously reported values in canopy  
421 dominant trees from other forest FACE experiments (Bader et al., 2010, 42-48%; Crous et al.,  
422 2008, 40-68%; Liberloo et al., 2007, 49%; Sholtis et al., 2004, 44%), but is somewhat higher than the

423 value of 19% from the EucFACE experiment on mature *Eucalyptus* trees (Ellsworth et al. 2017). The  
424 lower photosynthetic enhancement observed at EucFACE was likely due to lower nutrient availability  
425 compared to BIFoR (Crous et al., 2015), although there were other differences such as the tree  
426 species and prevailing temperatures that would also affect the magnitude of the photosynthetic  
427 enhancement.

#### 428 *The role of environmental conditions for photosynthetic enhancement*

429 Consistent with our initial hypothesis, we observed significantly higher  $A_{\text{net}}$  and a 24% higher  
430 photosynthetic enhancement under the highest light conditions at BIFoR FACE (i.e.,  $Q > 1000 \mu\text{mol}$   
431  $\text{m}^{-2} \text{s}^{-1}$ ) compared to the lowest light category. Thus, a negative linear relationship was observed for  
432 both  $A_{\text{net}}$  and  $e\text{CO}_2$ -induced photosynthetic enhancement with decreasing light levels. Our results  
433 are consistent with previous research on mature trees that observed an effect of light on the  
434 magnitude of  $\text{CO}_2$ -driven stimulation of photosynthesis (Bader et al., 2016), suggesting variation in  
435 light should be considered when assessing the response to  $e\text{CO}_2$ . Consequently, the relationship of  
436  $A_{\text{net}}$  and  $\text{CO}_2$  treatment effect with light intensity is important when scaling upper canopy data both  
437 across diurnal periods of light limitation and extending to the whole canopy, of shaded and sunlit  
438 leaves, to avoid overestimating canopy-scale photosynthesis by temperate forests.

439 It has been previously suggested that larger photosynthetic enhancement may be expected in low  
440 light environments (Hättenschwiler, 2001; Norby & Zak, 2011). For example, deep shaded tree  
441 seedlings displayed greater photosynthetic gains than those in moderate shade (photosynthetic  
442 enhancement of 97% and 47%, respectively) with exposure to  $e\text{CO}_2$  (Kitao et al., 2015). In light-  
443 limited environments, higher  $\text{CO}_2$  concentrations can increase the apparent quantum yield and  
444 reduce the light compensation point (LCP) leading to enhanced carbon uptake (Larcher, 2003; Kitao  
445 et al., 2015). Hättenschwiler (2001) found large interspecific variability and, in *Quercus*, that greater  
446 photosynthetic responses to  $\text{CO}_2$  occurred under higher light when compared to low light. However,  
447 both Kitao et al., (2015) and Hättenschwiler (2001) studied tree seedlings in contrast to upper

448 canopy leaves of a canopy dominant species in the present study. Although shade leaves were not  
449 measured here, the results here from the top of the tree canopy provide an important benchmark  
450 for the magnitude of photosynthetic enhancement by elevated CO<sub>2</sub> in a mature oak forest.

451 In addition to light intensity, the photosynthetic response of *Q. robur* varied across the growing  
452 season, as has been observed in many other trees (Rogers & Ellsworth, 2002; Sholtis et al., 2004;  
453 Tissue et al., 1999). Here, A<sub>sat</sub> (derived from the A-C<sub>i</sub> dataset) in both CO<sub>2</sub> treatments increased about  
454 50% from early in the season (May), to the middle of the season (July); yet, the relative response  
455 ratio to eCO<sub>2</sub> was stable throughout this period at 32%. Additionally, when assessing the diurnal  
456 dataset, we found contrasting seasonal patterns between 2018 and 2019, with decreases in A<sub>net</sub>  
457 across the growing season observed in 2018 compared to increases in A<sub>net</sub> in 2019, likely due to drier  
458 and warmer conditions in 2018. Previous research has identified reductions in photosynthesis across  
459 the season is largely associated with drier conditions (Gunderson et al., 2002), which support the  
460 results observed in the present study. This suggests that the influence of soil water availability on  
461 the seasonal pattern in oak physiology is critical for determining seasonal C-uptake by mature  
462 forests and should be further investigated in mature *Q. robur* to improve longer term carbon-climate  
463 models (see Limousin et al., 2013).

464 Previous research has identified eCO<sub>2</sub>-driven photosynthetic responses observed in seedlings and  
465 saplings may not reflect the photosynthetic responses of mature forest-grown trees (Hättenschwiler  
466 et al., 1997). The present study provided a unique opportunity to assess the eCO<sub>2</sub>-driven  
467 photosynthetic responses in 175-year old canopy dominant trees and found lower photosynthetic  
468 stimulation than the many previous studies on tree seedlings and younger trees (e.g. Ainsworth &  
469 Long, 2005; Curtis & Wang, 1998; Crous et al., 2008; Liberloo et al., 2007; Sholtis et al., 2004). The  
470 age dependency of CO<sub>2</sub> responsiveness to photosynthesis in trees (Turnbull et al., 1998; Wujeska-  
471 Klause et al., 2019a), highlights the importance of long-term experiments, such as the present study  
472 and others in understanding potential variable responses across the lifetime of a tree, vital for  
473 accurate climate-carbon modelling of forests.

474 *Did changes to photosynthetic capacity or leaf biochemistry occur under eCO<sub>2</sub>?*

475 In some studies, a time-dependent decline in the magnitude of eCO<sub>2</sub>-induced photosynthetic  
476 enhancement, i.e. photosynthetic downregulation, has been observed (Cure & Acock, 1986;  
477 Gunderson & Wullschleger, 1994). Here, we hypothesized that there may be reductions in  $V_{\text{cmax}}$ ,  $J_{\text{max}}$   
478 and leaf N, particularly in the 3<sup>rd</sup> year of eCO<sub>2</sub> exposure (Luo et al., 2004). Our analysis of the 86 A–C<sub>i</sub>  
479 curves collected in this experiment revealed no decrease in the rate of  $V_{\text{cmax}}$  or  $J_{\text{max}}$ , indicating that  
480 there were no significant changes in the photosynthetic capacity of *Q. robur* over the first three  
481 years of exposure to elevated CO<sub>2</sub>. A lack of photosynthetic downregulation has also been found in  
482 similar seasonally deciduous species, including the closely related species *Quercus petraea* (Bader et  
483 al., 2010), in addition to *Liquidambar styraciflua*, *Populus spp.* and *Betula papyrifera* (Herrick &  
484 Thomas, 2001; Sholtis et al., 2004; Liberloo et al., 2007; Uddling et al., 2009). An apparent lack of  
485 downregulation has also been observed in other mature forest-grown species (Ellsworth et al., 2017;  
486 Bader et al., 2010).

487 As nitrogen is required for the synthesis and maintenance of photosynthetic proteins, eCO<sub>2</sub>-driven  
488 photosynthetic downregulation has been associated with declines in foliar N (as reviewed in Medlyn  
489 et al., 1999) and soil N-limitations (e.g. Crous et al., 2008; Rogers & Ellsworth, 2002; Warren et al.,  
490 2015). The current study on *Q. robur* did not find any changes in either mass- or area- based leaf  
491 nitrogen across the study period, indicating there are no reductions to photosynthetic capacity (Fig.  
492 5.). This corroborates the findings from the  $V_{\text{cmax}}$  and  $J_{\text{max}}$  parameters, supporting the suggestion for  
493 sustained photosynthesis in *Q. robur* over the first three years of exposure to elevated CO<sub>2</sub>. Hence,  
494 there were no changes to the ratio of  $J_{\text{max}}$  to  $V_{\text{cmax}}$ , indicating that the relationship between  
495 carboxylation and light-harvesting processes was not affected by CO<sub>2</sub> treatment, as found in  
496 previous studies (Crous et al., 2008; Medlyn et al., 1999), including the closely related species, *Q.*  
497 *petraea* (Bader et al., 2010). These results may point to soil nutrient availability not yet limiting the  
498 photosynthetic processes in this forest system. The BIFoR FACE site receives moderately high  
499 atmospheric N deposition (~22 Kg N/ha/yr) thought to represent 15% of the total nitrogen nutrition

500 of temperate deciduous trees, likely preventing ecosystem N-limitation at present (Rennenberg &  
501 Dannenmann, 2015). Therefore, with adequate N deposition in the soil, sustained photosynthetic  
502 enhancement was observed in the first three years of eCO<sub>2</sub> exposure at BIFoR FACE.

### 503 **Conclusions**

504 After three years of eCO<sub>2</sub> exposure in a temperate deciduous forest at the BIFoR FACE facility,  
505 photosynthetic enhancement of mature *Q. robur* leaves at the top of the canopy was sustained  
506 across all years and was 33 ± 8% (mean ± s.e.) at light saturation, close to the theoretical  
507 expectation. The magnitude of photosynthetic enhancement was significantly affected by light  
508 conditions with higher enhancement at higher light. We found no evidence of photosynthetic  
509 downregulation under eCO<sub>2</sub> and no declines in leaf nitrogen in the upper canopy. The lack of  
510 evidence for downregulation suggest there are sufficient soil nutrients for *Q. robur* to maintain a  
511 relatively high photosynthetic enhancement under eCO<sub>2</sub> conditions, at least to this point in the eCO<sub>2</sub>  
512 experiment. Much further work remains to determine the movement and allocation of this  
513 enhanced C uptake in the forest. Our results are consistent with a sustained, positive C uptake  
514 response to rising atmospheric CO<sub>2</sub> in a mature deciduous forest tree species, provided adequate  
515 nutrients are available.

516

517

518

519

520

521

522

523 **Conflict of interest**

524 None declared

525

526 **Acknowledgments**

527 We thank the BIFoR technical team for canopy access operations and Ian Boomer for technical  
528 support with leaf elemental analysis. AG gratefully thanks Agnieszka Wujeska-Klaue for guidance  
529 with statistical analysis in the early stages of the manuscript. AG gratefully acknowledges a  
530 studentship provided by the John Horseman Trust and the University of Birmingham. The BIFoR  
531 FACE facility is supported by the JABBS foundation, the University of Birmingham and the John  
532 Horseman Trust. ARMK acknowledges support from the Natural Research Council through grant  
533 (NE/S015833/1) which also facilitated DSE's participation. We further gratefully acknowledge advice  
534 and field measurement collection in the first CO<sub>2</sub> fumigation season from Michael Tausz and Sabine  
535 Tausz-Pösch, respectively.

536

537 **Author contributions**

538 ARMK, JP, and AG designed the study; AG, KYC and DSE collected the data. AG organised the  
539 datasets under the supervision of DSE, with input from ARMK; AG and DSE designed and performed  
540 the statistical analyses, with input from KYC and ARMK. AG and DSE wrote the first draft of the  
541 paper. All authors contributed to the manuscript revision, and read and approved the submitted  
542 version.

543

544

545

546

547 **References**

- 548 Ainsworth, E. A., & Long, S. P. (2005). What have we learned from 15 years of free-air CO<sub>2</sub> enrichment (FACE)?  
549 A meta-analytic review of the responses of photosynthesis, canopy properties and plant production to  
550 rising CO<sub>2</sub>. *New Phytologist*, *165*(2), 351–372. <https://doi.org/10.1111/j.1469-8137.2004.01224.x>
- 551 Ainsworth, E. A., & Rogers, A. (2007). The response of photosynthesis and stomatal conductance to rising  
552 [CO<sub>2</sub>]: Mechanisms and environmental interactions. *Plant, Cell and Environment*, *30*(3), 258–270.  
553 <https://doi.org/10.1111/j.1365-3040.2007.01641.x>
- 554 Ainsworth, E. A., Rogers, A., Nelson, R., & Long, S. P. (2004). Testing the “source-sink” hypothesis of down-  
555 regulation of photosynthesis in elevated [CO<sub>2</sub>] in the field with single gene substitutions in *Glycine max*.  
556 *Agricultural and Forest Meteorology*, *122*(1–2), 85–94. <https://doi.org/10.1016/j.agrformet.2003.09.002>
- 557 Bader, M. K. F., Leuzinger, S., Keel, S. G., Siegwolf, R. T. W., Hagedorn, F., Schleppi, P., & Körner, C. (2013).  
558 Central european hardwood trees in a high-CO<sub>2</sub> future: Synthesis of an 8-year forest canopy CO<sub>2</sub>  
559 enrichment project. *Journal of Ecology*, *101*(6), 1509–1519. <https://doi.org/10.1111/1365-2745.12149>
- 560 Bader, M. K. F., Mildner, M., Baumann, C., Leuzinger, S., & Körner, C. (2016). Photosynthetic enhancement and  
561 diurnal stem and soil carbon fluxes in a mature Norway spruce stand under elevated CO<sub>2</sub>. *Environmental  
562 and Experimental Botany*, *124*, 110–119. <https://doi.org/10.1016/j.envexpbot.2015.12.005>
- 563 Bader, M. K. F., Siegwolf, R., & Körner, C. (2010). Sustained enhancement of photosynthesis in mature  
564 deciduous forest trees after 8 years of free air CO<sub>2</sub> enrichment. *Planta*, *232*(5), 1115–1125.  
565 <https://doi.org/10.1007/s00425-010-1240-8>
- 566 Bonan, G. B. (2008). Forests and climate change: Forcings, feedbacks, and the climate benefits of forests.  
567 *Science*, *320*(5882), 1444–1449. <https://doi.org/10.1126/science.1155121>
- 568 Brodribb, T. J., Powers, J., Cochard, H., & Choat, B. (2020). Hanging by a thread? Forests and drought. *Science*,  
569 *368*(6488), 261–266. <https://doi.org/10.1126/science.aat7631>
- 570 Cox, P. M., Pearson, D., Booth, B. B., Friedlingstein, P., Huntingford, C., Jones, C. D., & Luke, C. M. (2013).  
571 Sensitivity of tropical carbon to climate change constrained by carbon dioxide variability. *Nature*,  
572 *494*(7437), 341–344. <https://doi.org/10.1038/nature11882>
- 573 Crous, K. Y., & Ellsworth, D. S. (2004). Canopy position affects photosynthetic adjustments to long-term  
574 elevated CO<sub>2</sub> concentration (FACE) in aging needles in a mature *Pinus taeda* forest. *Tree Physiology*,

- 575 24(9), 961–970. <https://doi.org/10.1093/treephys/24.9.961>
- 576 Crous, K. Y., Ósvaldsson, A., & Ellsworth, D. S. (2015). Is phosphorus limiting in a mature Eucalyptus woodland?  
577 Phosphorus fertilisation stimulates stem growth. *Plant and Soil*, 391(1–2), 293–305.  
578 <https://doi.org/10.1007/s11104-015-2426-4>
- 579 Crous, K. Y., Reich, P. B., Hunter, M. D., & Ellsworth, D. S. (2010). Maintenance of leaf N controls the  
580 photosynthetic CO<sub>2</sub> response of grassland species exposed to 9 years of free-air CO<sub>2</sub> enrichment. *Global*  
581 *Change Biology*, 16(7), 2076–2088. <https://doi.org/10.1111/j.1365-2486.2009.02058.x>
- 582 Crous, K. Y., Walters, M. B., & Ellsworth, D. S. (2008). Elevated CO<sub>2</sub> concentration affects leaf photosynthesis-  
583 nitrogen relationships in *Pinus taeda* over nine years in FACE. *Tree Physiology*, 28(4), 607–614.  
584 <https://doi.org/10.1093/treephys/28.4.607>
- 585 Cure, J. D., & Acock, B. (1986). Crop responses to carbon dioxide doubling: a literature survey. *Agricultural and*  
586 *Forest Meteorology*, 38(1–3), 127–145. [https://doi.org/10.1016/0168-1923\(86\)90054-7](https://doi.org/10.1016/0168-1923(86)90054-7)
- 587 Curtis, P. S., & Wang, X. (1998). A meta-analysis of elevated CO<sub>2</sub> effects on woody plant mass, form, and  
588 physiology. *Oecologia*, 113(3), 299–313.
- 589 Duursma, R. A. (2015). Plantecophys - An R package for analysing and modelling leaf gas exchange data. *PLoS*  
590 *ONE*, 10(11). <https://doi.org/10.1371/journal.pone.0143346>
- 591 Eaton, E., Caudullo, G., Oliveira, S., & de Rigo, D. (2016). *Quercus robur* and *Quercus petraea* in Europe:  
592 distribution, habitat, usage and threats. *European Atlas of Forest Tree Species*, March, 160–163.
- 593 Ellsworth, D. S., Anderson, I. C., Crous, K. Y., Cooke, J., Drake, J. E., Gherlenda, A. N., Gimeno, T. E., Macdonald,  
594 C. A., Medlyn, B. E., Powell, J. R., Tjoelker, M. G., & Reich, P. B. (2017). Elevated CO<sub>2</sub> does not increase  
595 eucalypt forest productivity on a low-phosphorus soil. *Nature Climate Change*, 7(4), 279–282.  
596 <https://doi.org/10.1038/nclimate3235>
- 597 Ellsworth, D. S., Thomas, R., Crous, K. Y., Palmroth, S., Ward, E., Maier, C., Delucia, E., & Oren, R. (2012).  
598 Elevated CO<sub>2</sub> affects photosynthetic responses in canopy pine and subcanopy deciduous trees over 10  
599 years: A synthesis from Duke FACE. *Global Change Biology*, 18(1), 223–242.  
600 <https://doi.org/10.1111/j.1365-2486.2011.02505.x>
- 601 Farquhar, G. D., von Caemmerer, S., & Berry, J. A. (1980). A biochemical model of photosynthetic CO<sub>2</sub>  
602 assimilation in leaves of C<sub>3</sub> species. *Planta*, 149(1), 78–90. <https://doi.org/10.1007/BF00386231>
- 603 Feng, Z., Rütting, T., Pleijel, H., Wallin, G., Reich, P. B., Kammann, C. I., Newton, P. C. D., Kobayashi, K., Luo, Y.,



- 604 & Uddling, J. (2015). Constraints to nitrogen acquisition of terrestrial plants under elevated CO<sub>2</sub>. *Global*  
605 *Change Biology*, 21(8), 3152–3168. <https://doi.org/10.1111/gcb.12938>
- 606 Friedlingstein, P., Betts, R., Bopp, L., Bloh, W. Von, Brovkin, V., Doney, S., Eby, M., Fung, I., Govindasamy, B.,  
607 John, J., Jones, C., Joos, F., Kato, T., Kawamiya, M., Knorr, W., Lindsay, K., Matthews, H. D., Raddatz, T.,  
608 Rayner, P., ... Zeng, N. (2006). Climate–carbon cycle feedback analysis, results from the C4MIP model  
609 intercomparison. *Journal of Climate*, 19, 3337–3353. <https://doi.org/10.1175/JCLI3800.1>
- 610 Friedlingstein, Pierre, Jones, M. W., O’Sullivan, Michael Andrew, R. M., Hauck, J., Peters, G. P., Peters, W.,  
611 Pongratz, J., Sitch, S., Le Quéré, C., Bakker, D. C. E., Canadell, J. G., Ciais, P., Jackson, R., & Zaehle, A. J.  
612 (2019). Global carbon budget 2019. *Earth Syst. Sci. Data*, 11(4), 1783–1838.  
613 <https://doi.org/https://doi.org/10.3929/ethz-b-000385668> Originally
- 614 Griffin, K. L., Tissue, D. T., Turnbull, M. H., & Whitehead, D. (2000). The onset of photosynthetic acclimation to  
615 elevated CO<sub>2</sub> partial pressure in field-grown *Pinus radiata* D. Don. after 4 years. *Plant, Cell and*  
616 *Environment*, 23(10), 1089–1098. <https://doi.org/10.1046/j.1365-3040.2000.00622.x>
- 617 Gunderson, C. A., Sholtis, J. D., Wullschlegel, S. D., Tissue, D. T., Hanson, P. J., & Norby, R. J. (2002).  
618 Environmental and stomatal control of photosynthetic enhancement in the canopy of a sweetgum  
619 (*Liquidambar styraciflua* L.) plantation during 3 years of CO<sub>2</sub> enrichment. *Plant, Cell and Environment*,  
620 25(3), 379–393. <https://doi.org/10.1046/j.0016-8025.2001.00816.x>
- 621 Gunderson, C. A., & Wullschlegel, S. D. (1994). Photosynthetic acclimation in trees to rising atmospheric CO<sub>2</sub>:  
622 A broader perspective. *Photosynthesis Research*, 39(3), 369–388. <https://doi.org/10.1007/BF00014592>
- 623 Hart, K. M., Curioni, G., Blaen, P., Harper, N. J., Miles, P., Lewin, K. F., Nagy, J., Bannister, E. J., Cai, X. M.,  
624 Thomas, R. M., Krause, S., Tausz, M., & MacKenzie, A. R. (2020). Characteristics of free air carbon dioxide  
625 enrichment of a northern temperate mature forest. *Global Change Biology*, 26(2), 1023–1037.  
626 <https://doi.org/10.1111/gcb.14786>
- 627 Hättenschwiler, S. (2001). Tree seedling growth in natural deep shade: Functional traits related to interspecific  
628 variation in response to elevated CO<sub>2</sub>. *Oecologia*, 129(1), 31–42.  
629 <https://doi.org/10.1007/s004420100699>
- 630 Hättenschwiler, S., Miglietta, F., Raschi, A., & Körner, C. (1997). Thirty years of in situ tree growth under  
631 elevated CO<sub>2</sub>: A model for future forest responses? *Global Change Biology*, 3(5), 463–471.  
632 <https://doi.org/10.1046/j.1365-2486.1997.00105.x>

- 633 Hendrey, G., Ellsworth, D., Lewin, K., & Nagy, J. (1999). A free-air enrichment system for exposing tall forest  
634 vegetation to elevated atmospheric CO<sub>2</sub>. *Global Change Biology*, *5*, 293–309.
- 635 Herrick, J. D., & Thomas, R. B. (2001). No photosynthetic down-regulation in sweetgum trees (*Liquidambar*  
636 *styraciflua* L.) after three years of CO<sub>2</sub> enrichment at the Duke Forest FACE experiment. *Plant, Cell and*  
637 *Environment*, *24*(1), 53–64. <https://doi.org/10.1046/j.1365-3040.2001.00652.x>
- 638 Jiang, M., Medlyn, B. E., Drake, J. E., Duursma, R. A., Anderson, I. C., Barton, C. V. M., Boer, M. M., Carrillo, Y.,  
639 Castañeda-Gómez, L., Collins, L., Crous, K. Y., De Kauwe, M. G., dos Santos, B. M., Emmerson, K. M.,  
640 Facey, S. L., Gherlenda, A. N., Gimeno, T. E., Hasegawa, S., Johnson, S. N., ... Ellsworth, D. S. (2020). The  
641 fate of carbon in a mature forest under carbon dioxide enrichment. *Nature*, *580*(7802), 227–231.  
642 <https://doi.org/10.1038/s41586-020-2128-9>
- 643 Jones, C. D., Ciais, P., Davis, S. J., Friedlingstein, P., Gasser, T., Peters, G. P., Rogelj, J., Van Vuuren, D. P.,  
644 Canadell, J. G., Cowie, A., Jackson, R. B., Jonas, M., Kriegler, E., Littleton, E., Lowe, J. A., Milne, J.,  
645 Shrestha, G., Smith, P., Torvanger, A., & Wiltshire, A. (2016). Simulating the Earth system response to  
646 negative emissions. *Environmental Research Letters*, *11*(9). [https://doi.org/10.1088/1748-](https://doi.org/10.1088/1748-9326/11/9/095012)  
647 [9326/11/9/095012](https://doi.org/10.1088/1748-9326/11/9/095012)
- 648 Kitao, M., Hida, T., Eguchi, N., Tobita, H., Utsugi, H., Uemura, A., Kitaoka, S., & Koike, T. (2015). Light  
649 compensation points in shade-grown seedlings of deciduous broadleaf tree species with different  
650 successional traits raised under elevated CO<sub>2</sub>. *Plant Biology*, *18*(1), 31–42.  
651 <https://doi.org/10.1007/s004420100699>
- 652 Klein, T., Bader, M. K. F., Leuzinger, S., Mildner, M., Schleppi, P., Siegwolf, R. T. W., & Kömer, C. (2016). Growth  
653 and carbon relations of mature *Picea abies* trees under 5 years of free-air CO<sub>2</sub> enrichment. *Journal of*  
654 *Ecology*, *104*(6), 1720–1733. <https://doi.org/10.1111/1365-2745.12621>
- 655 Körner, C. (2017). A matter of tree longevity. *Science*, *355*(6321), 130–131.  
656 <https://doi.org/10.1126/science.aal2449>
- 657 Körner, C., Asshoff, R., Bignucolo, O., Hättenschwiler, S., Keel, S. G., Peláez-Riedl, S., Pepin, S., Siegwolf, R. T.  
658 W., & Zotz, G. (2005). Ecology: Carbon flux and growth in mature deciduous forest trees exposed to  
659 elevated CO<sub>2</sub>. *Science*, *309*(5739), 1360–1362. <https://doi.org/10.1126/science.1113977>
- 660 Leakey, A. D. B., Ainsworth, E. A., Bernacchi, C. J., Rogers, A., Long, S. P., & Ort, D. R. (2009). Elevated CO<sub>2</sub>  
661 effects on plant carbon, nitrogen, and water relations: Six important lessons from FACE. *Journal of*

- 662 *Experimental Botany*, 60(10), 2859–2876. <https://doi.org/10.1093/jxb/erp096>
- 663 Liberloo, M., Tulva, I., Raim, O., Kull, O., & Ceulemans, R. (2007). Photosynthetic stimulation under long-term  
664 CO<sub>2</sub> enrichment and fertilization is sustained across a closed Populus canopy profile (EUROFACE). *New*  
665 *Phytologist*, 173(3), 537–549. <https://doi.org/10.1111/j.1469-8137.2006.01926.x>
- 666 Limousin, J. M., Bickford, C. P., Dickman, L. T., Pangle, R. E., Hudson, P. J., Boutz, A. L., Gehres, N., Osuna, J. L.,  
667 Pockman, W. T., & McDowell, N. G. (2013). Regulation and acclimation of leaf gas exchange in a piñon-  
668 juniper woodland exposed to three different precipitation regimes. *Plant, Cell and Environment*, 36(10),  
669 1812–1825. <https://doi.org/10.1111/pce.12089>
- 670 Luo, Y., Su, B., Currie, W. S., Dukes, J. S., Finzi, A., Hartwig, U., Hungate, B., McMurtrie, R. E., Oren, R., Parton,  
671 W. J., Pataki, D. E., Shaw, M. R., Zak, D. R., & Field, C. B. (2004). Progressive nitrogen limitation of  
672 ecosystem responses to rising atmospheric carbon dioxide. *BioScience*, 54(8), 731–739.  
673 [https://doi.org/10.1641/0006-3568\(2004\)054\[0731:PNLOER\]2.0.CO;2](https://doi.org/10.1641/0006-3568(2004)054[0731:PNLOER]2.0.CO;2)
- 674 Luyssaert, S., Schulze, E. D., Börner, A., Knohl, A., Hessenmöller, D., Law, B. E., Ciais, P., & Grace, J. (2008). Old-  
675 growth forests as global carbon sinks. *Nature*, 455(7210), 213–215.  
676 <https://doi.org/10.1038/nature07276>
- 677 MacKenzie, R., Krause, S., Hart, K., Thomas, R., Blaen, P., Hamilton, R., Curioni, G., Quick, S., Kourmouli, A.,  
678 Hannah, D., Comer-Warner, S., Brekenfeld, N., Ullah, S., & Press, M. (2021). BIFoR FACE: Water-soil-  
679 vegetation-atmosphere research in a temperate deciduous forest catchment, including under elevated  
680 CO<sub>2</sub>. *Hydrological Processes*, 1–9.
- 681 Medlyn, B. E., Badeck, F. W., De Pury, D. G. G., Barton, C. V. M., Broadmeadow, M., Ceulemans, R., De Angelis,  
682 P., Forstreuter, M., Jach, M. E., Kellomäki, S., Laitat, E., Marek, M., Philippot, S., Rey, A., Strassemeier, J.,  
683 Laitinen, K., Liozon, R., Portier, B., Roberntz, P., ... Jarvis, P. G. (1999). Effects of elevated [CO<sub>2</sub>] on  
684 photosynthesis in European forest species: A meta-analysis of model parameters. *Plant, Cell and*  
685 *Environment*, 22(12), 1475–1495. <https://doi.org/10.1046/j.1365-3040.1999.00523.x>
- 686 Medlyn, B. E., Zaehle, S., De Kauwe, M. G., Walker, A. P., Dietze, M. C., Hanson, P. J., Hickler, T., Jain, A. K., Luo,  
687 Y., Parton, W., Prentice, I. C., Thornton, P. E., Wang, S., Wang, Y. P., Weng, E., Iversen, C. M., McCarthy,  
688 H. R., Warren, J. M., Oren, R., & Norby, R. J. (2015). Using ecosystem experiments to improve vegetation  
689 models. *Nature Climate Change*, 5(6), 528–534. <https://doi.org/10.1038/nclimate2621>
- 690 Mölder, A., Meyer, P., & Nagel, R. V. (2019). Integrative management to sustain biodiversity and ecological

- 691 continuity in Central European temperate oak (*Quercus robur*, *Q. petraea*) forests: An overview. *Forest*  
692 *Ecology and Management*, 437(November 2018), 324–339.  
693 <https://doi.org/10.1016/j.foreco.2019.01.006>
- 694 Norby, R. J., De Kauwe, M. G., Domingues, T. F., Duursma, R. A., Ellsworth, D. S., Goll, D. S., Lapola, D. M., Luus,  
695 K. A., Mackenzie, A. R., Medlyn, B. E., Pavlick, R., Rammig, A., Smith, B., Thomas, R., Thonicke, K., Walker,  
696 A. P., Yang, X., & Zaehle, S. (2016). Model-data synthesis for the next generation of forest free-air CO<sub>2</sub>  
697 enrichment (FACE) experiments. *New Phytologist*, 209(1), 17–28. <https://doi.org/10.1111/nph.13593>
- 698 Norby, R. J., & Zak, D. R. (2011). Ecological and evolutionary lessons from free air carbon enhancement (FACE)  
699 experiments. *Annual Review of Ecology, Evolution, and Systematics*, 42, 181–203.  
700 <https://doi.org/10.1146/annurev-ecolsys-102209-144647>
- 701 Nowak, R. S., Ellsworth, D. S., & Smith, S. D. (2004). Functional responses of plants to elevated atmospheric  
702 CO<sub>2</sub> - Do photosynthetic and productivity data from FACE experiments support early predictions? *New*  
703 *Phytologist*, 162(2), 253–280. <https://doi.org/10.1111/j.1469-8137.2004.01033.x>
- 704 Ostle, N. J., Levy, P. E., Evans, C. D., & Smith, P. (2009). UK land use and soil carbon sequestration. *Land Use*  
705 *Policy*, 26(SUPPL. 1). <https://doi.org/10.1016/j.landusepol.2009.08.006>
- 706 Pan, Y., Birdsey, R. A., Fang, J., Houghton, R., Kauppi, P. E., Kurz, W. A., Phillips, O. L., Shvidenko, A., Lewis, S. L.,  
707 Canadell, J. G., Ciais, P., Jackson, R. B., Pacala, S. W., McGuire, A. D., Piao, S., Rautiainen, A., Sitch, S., &  
708 Hayes, D. (2011). A Large and Persistent Carbon Sink in the World's Forests. *Science*, 333(August), 4.  
709 <http://science.sciencemag.org/content/333/6045/988#BIBL>
- 710 Parsons, R., Weyers, J. D. B., Lawson, T., & Godber, I. M. (1998). Rapid and straightforward estimates of  
711 photosynthetic characteristics using a portable gas exchange system. *Photosynthetica*, 34(2), 265–279.  
712 <https://doi.org/10.1023/A:1006800909651>
- 713 Piao, S., Sitch, S., Ciais, P., Friedlingstein, P., Peylin, P., Wang, X., Ahlström, A., Anav, A., Canadell, J. G., Cong,  
714 N., Huntingford, C., Jung, M., Levis, S., Levy, P. E., Li, J., Lin, X., Lomas, M. R., Lu, M., Luo, Y., ... Zeng, N.  
715 (2013). Evaluation of terrestrial carbon cycle models for their response to climate variability and to CO<sub>2</sub>  
716 trends. *Global Change Biology*, 19(7), 2117–2132. <https://doi.org/10.1111/gcb.12187>
- 717 Rennenberg, H., & Dannenmann, M. (2015). Nitrogen nutrition of trees in temperate forests-the significance of  
718 nitrogen availability in the pedosphere and atmosphere. *Forests*, 6(8), 2820–2835.  
719 <https://doi.org/10.3390/f6082820>

- 720 Rogers, A., & Ellsworth, D. S. (2002). Photosynthetic acclimation of *Pinus taeda* (loblolly pine) to long-term  
721 growth in elevated pCO<sub>2</sub> (FACE). *Plant, Cell and Environment*, 25(7), 851–858.  
722 <https://doi.org/10.1046/j.1365-3040.2002.00868.x>
- 723 Sage, R. F., Way, D. A., & Kubien, D. S. (2008). Rubisco, Rubisco activase, and global climate change. *Journal of*  
724 *Experimental Botany*, 59(7), 1581–1595. <https://doi.org/10.1093/jxb/ern053>
- 725 Sharkey, T. D., Bernacchi, C. J., Farquhar, G. D., & Singsaas, E. L. (2007). Fitting photosynthetic carbon dioxide  
726 response curves for C3 leaves. *Plant, Cell and Environment*, 30(9), 1035–1040.  
727 <https://doi.org/10.1111/j.1365-3040.2007.01710.x>
- 728 Sholtis, J. D., Gunderson, C. A., Norby, R. J., & Tissue, D. T. (2004). Persistent stimulation of photosynthesis by  
729 elevated CO<sub>2</sub> in a sweetgum (*Liquidambar styraciflua*) forest stand. *New Phytologist*, 162(2), 343–354.  
730 <https://doi.org/10.1111/j.1469-8137.2004.01028.x>
- 731 Sigurdsson, B. D., Medhurst, J. L., Wallin, G., Eggertsson, O., & Linder, S. (2013). Growth of mature boreal  
732 Norway spruce was not affected by elevated [CO<sub>2</sub>] and/or air temperature unless nutrient availability  
733 was improved. *Tree Physiology*, 33(11), 1192–1205. <https://doi.org/10.1093/treephys/tpt043>
- 734 Sommerfeld, A., Senf, C., Buma, B., D'Amato, A. W., Després, T., Díaz-Hormazábal, I., Fraver, S., Frelich, L. E.,  
735 Gutiérrez, Á. G., Hart, S. J., Harvey, B. J., He, H. S., Hlásny, T., Holz, A., Kitzberger, T., Kulakowski, D.,  
736 Lindenmayer, D., Mori, A. S., Müller, J., ... Seidl, R. (2018). Patterns and drivers of recent disturbances  
737 across the temperate forest biome. *Nature Communications*, 9(1). [https://doi.org/10.1038/s41467-018-](https://doi.org/10.1038/s41467-018-06788-9)  
738 [06788-9](https://doi.org/10.1038/s41467-018-06788-9)
- 739 Terrer, C., Jackson, R. B., Prentice, I. C., Keenan, T. F., Kaiser, C., Vicca, S., Fisher, J. B., Reich, P. B., Stocker, B.  
740 D., Hungate, B. A., Peñuelas, J., McCallum, I., Soudzilovskaia, N. A., Cernusak, L. A., Talhelm, A. F., Van  
741 Sundert, K., Piao, S., Newton, P. C. D., Hovenden, M. J., ... Franklin, O. (2019). Nitrogen and phosphorus  
742 constrain the CO<sub>2</sub> fertilization of global plant biomass. *Nature Climate Change*, 9(9), 684–689.  
743 <https://doi.org/10.1038/s41558-019-0545-2>
- 744 Tissue, D. T., Griffin, K. L., & Ball, J. T. (1999). Photosynthetic adjustment in field-grown ponderosa pine trees  
745 after six years of exposure to elevated CO<sub>2</sub>. *Tree Physiology*, 19(4–5), 221–228.  
746 <https://doi.org/10.1093/treephys/19.4-5.221>
- 747 Turnbull, M. H., Tissue, D. T., Griffin, K. L., Rogers, G. N. D., & Whitehead, D. (1998). Photosynthetic acclimation  
748 to long-term exposure to elevated CO<sub>2</sub> concentration in *Pinus radiata* D. Don. is related to

- 749 age of needles. *Plant, Cell and Environment*, 21(10), 1019–1028. <https://doi.org/10.1046/j.1365->  
750 3040.1998.00374.x
- 751 Uddling, J., Teclaw, R. M., Pregitzer, K. S., & Ellsworth, D. S. (2009). Leaf and canopy conductance in aspen and  
752 aspen-birch forests under free-air enrichment of carbon dioxide and ozone. *Tree Physiology*, 29(11),  
753 1367–1380. <https://doi.org/10.1093/treephys/tpp070>
- 754 Valentini, R., Epron, D., De Angelis, P., Matteucci, G., & Dreyer, E. (1995). In situ estimation of net CO<sub>2</sub>  
755 assimilation, photosynthetic electron flow and photorespiration in Turkey oak (*Q. cerris* L.) leaves:  
756 diurnal cycles under different levels of water supply. *Plant, Cell & Environment*, 18(6), 631–640.  
757 <https://doi.org/10.1111/j.1365-3040.1995.tb00564.x>
- 758 Verryckt, L. T., Van Langenhove, L., Ciais, P., Courtois, E. A., Vicca, S., Peñuelas, J., Stahl, C., Coste, S., Ellsworth,  
759 D. S., Posada, J. M., Obersteiner, M., Chave, J., & Janssens, I. A. (2020). Coping with branch excision when  
760 measuring leaf net photosynthetic rates in a lowland tropical forest. *Biotropica*, 52(4), 608–615.  
761 <https://doi.org/10.1111/btp.12774>
- 762 Warren, J. M., Jensen, A. M., Medlyn, B. E., Norby, R. J., & Tissue, D. T. (2015). Carbon dioxide stimulation of  
763 photosynthesis in *Liquidambar styraciflua* is not sustained during a 12-year field experiment. *AoB*  
764 *PLANTS*, 7(1). <https://doi.org/10.1093/aobpla/plu074>
- 765 Wujeska-Klaue, A., Crous, K. Y., Ghannoum, O., & Ellsworth, D. S. (2019a). Leaf age and eCO<sub>2</sub> both influence  
766 photosynthesis by increasing light harvesting in mature *Eucalyptus tereticornis* at EucFACE.  
767 *Environmental and Experimental Botany*, 167(August), 103857.  
768 <https://doi.org/10.1016/j.envexpbot.2019.103857>
- 769 Wujeska-Klaue, A., Crous, K. Y., Ghannoum, O., & Ellsworth, D. S. (2019b). Lower photorespiration in elevated  
770 CO<sub>2</sub> reduces leaf N concentrations in mature Eucalyptus trees in the field. *Global Change Biology*, 25(4),  
771 1282–1295. <https://doi.org/10.1111/gcb.14555>
- 772 Zhu, Z., Piao, S., Myneni, R. B., Huang, M., Zeng, Z., Canadell, J. G., Ciais, P., Sitch, S., Friedlingstein, P., Arneeth,  
773 A., Cao, C., Cheng, L., Kato, E., Koven, C., Li, Y., Lian, X., Liu, Y., Liu, R., Mao, J., ... Zeng, N. (2016).  
774 Greening of the Earth and its drivers. *Nature Climate Change*, 6(8), 791–795.  
775 <https://doi.org/10.1038/nclimate3004>  
776  
777

778 **Figure legends**

779

780 Figure 1. Time series showing the daily meteorological data at the BIFoR FACE facility covering the period of  
781 01-01-2015 to 01-01-2021. Subplots are: **A**) maximum, (red), mean (orange) and minimum (blue) daily air  
782 temperatures ( $^{\circ}\text{C}$ ), **B**) global downwelling solar radiation ( $\text{MJ m}^{-2}$ ) and **C**) total daily precipitation (mm). Vertical  
783 dashed lines indicate diurnal sampling days. Clusters of sampling days occurred because different plots were  
784 sampled on different days in the same seasonal timeframe. Meteorological data is from RAF Shawbury, located  
785 20 miles west of the BIFoR FACE facility, retrieved from the UK Met Office  
786 (<https://www.metoffice.gov.uk/research/climate/maps-and-data/historic-station-data>).

787

788 Figure 2. *In situ* diurnal measurements of **A**)  $Q$  ( $\mu\text{mol m}^{-2} \text{s}^{-1}$ ), **B**) hourly mean  $T_{\text{leaf}}$  ( $^{\circ}\text{C}$ ) and **C**) hourly mean  $A_{\text{net}}$   
789 ( $\mu\text{mol m}^{-2} \text{s}^{-1}$ ); each fitted with an LOESS regression, at BIFoR FACE in 2018 from the upper *Q. robur* canopy.  
790 Error bars indicate  $n=3$ , with the exception of September where only two replicate plots were measured and  
791 not all time points were replicated. The line types in A) represent replicate plot pairings of; plots 1 and 3  
792 (dotted), plots 2 and 4 (solid), and plots 5 and 6 (long-dash) and the two colours represent the  $\text{CO}_2$  treatments  
793 of  $\text{aCO}_2$  (blue) and  $\text{eCO}_2$  (red).

794

795 Figure 3. *In situ* diurnal measurements of **A**)  $Q$  ( $\mu\text{mol m}^{-2} \text{s}^{-1}$ ), **B**) hourly mean  $T_{\text{leaf}}$  ( $^{\circ}\text{C}$ ) and **C**) hourly mean  $A_{\text{net}}$   
796 ( $\mu\text{mol m}^{-2} \text{s}^{-1}$ ); each fitted with an LOESS regression, at BIFoR FACE in 2019 from the upper *Q. robur* canopy.  
797 Error bars indicate  $n=3$ , the exception of June where only two replicate plots were measured and not all time  
798 points were replicated. The line types in A) represent replicate plot pairings of; plots 1 and 3 (dotted), plots 2  
799 and 4 (solid), and plots 5 and 6 (long-dash) and the two colours represent the  $\text{CO}_2$  treatments of  $\text{aCO}_2$  (blue)  
800 and  $\text{eCO}_2$  (red).

801

802 Figure 4. **A**) The distribution of net photosynthesis ( $A_{\text{net}}$ ) ( $\mu\text{mol m}^{-2} \text{s}^{-1}$ ) in each of the four photon flux density  
803 ( $Q$ ) categories ( $Q < 250$ ;  $250 \geq Q < 500$ ;  $500 \geq Q < 1000$ ; and  $Q \geq 1000 \mu\text{mol m}^{-2} \text{s}^{-1}$ ) for years 2018 (left) and

804 2019 (right). Whiskers denote the 5 %ile and 95 %ile; outliers are plotted as individual points (filled circles).  
805 The box denotes the interquartile range and the bar denotes the median with the number of data points  
806 above each boxplot. The mean is also plotted as a diamond symbol. Data uses diurnal gas exchange  
807 measurements in the upper canopy oak trees at the BIFoR FACE facility with  $T_{\text{leaf}} > 18^\circ\text{C}$  and  $D < 2.2\text{ kPa}$ , in  $e\text{CO}_2$   
808 (red) or  $a\text{CO}_2$  (blue) treatments. Red diamonds indicate the mean  $A_{\text{net}}$  values. **B)** Boxplots of the enhancement  
809 response ratio ( $A_{550}/A_{400}$ ) (grey) for each year, and predicted enhancement ratio (dashed line) (1.37) following  
810 Nowak et al (2004).

811

812 Figure 5. Maximum rates of **(A)** carboxylation ( $V_{\text{cmax}}$ ) and **(B)** electron transport ( $J_{\text{max}}$ ), in addition to **(C)** area  
813 based ( $N_a$ ) and **(D)** mass based ( $N_m$ ) leaf nitrogen of upper canopy *Q. robur* from 2015 to 2019 at BIFoR FACE.  
814 Means ( $\pm$  SE) of whole-plot averages ( $n=3$ ) for ambient (blue circles) and elevated (red triangles)  $\text{CO}_2$   
815 treatments. Dashed line indicate the separation of sampling years with campaigns labelled 'month/year', as  
816 follows: Pre-treatment ('07/15'); 1<sup>st</sup> Year ('06/17'); and the 3<sup>rd</sup> year ('05/19' - '08/19') of  $\text{CO}_2$  fumigation. Data  
817 points may obscure error bars.

818

819 Figure 6. **A)** Net photosynthesis ( $A_{\text{net}}$ ) at growth  $\text{CO}_2$  and **B)** Instantaneous (2015) and longer-term (2017 and  
820 2019) response ratios in the upper oak canopy using the  $A-C_i$  curve data. Means ( $\pm$  SD) of the plots per  
821 treatment are shown across six sampling campaigns for  $a\text{CO}_2$  (blue circles),  $e\text{CO}_2$  (red triangles) and either the  
822 instantaneous (grey squares) or longer-term response ratio (grey circles). Dashed line indicate the separation  
823 of sampling years with campaigns labelled as follows; Pre-treatment ('07/15'), 1<sup>st</sup> Year ('06/17') and the 3<sup>rd</sup>  
824 year ('05/19'-'08/19') of  $\text{CO}_2$  fumigation.

825

826

827

828

829



830 **Symbols and Abbreviations**

831 [CO<sub>2</sub>] CO<sub>2</sub> concentration of the atmosphere

832 A photosynthesis

833 A–C<sub>i</sub> curve Photosynthetic CO<sub>2</sub> response curve

834 aCO<sub>2</sub> CO<sub>2</sub> at ambient Ca (~405 ppm)

835 A<sub>net</sub> Net photosynthetic rates.

836 A<sub>sat</sub> Light-saturated net photosynthesis

837 C Carbon

838 CAS Canopy access system

839 C<sub>i</sub> CO<sub>2</sub> concentration of the intercellular leaf space

840 eCO<sub>2</sub> CO<sub>2</sub> at elevated Ca (+150 ppm ambient)

841 FACE Free air carbon dioxide enrichment

842 J<sub>max</sub> Maximal photosynthetic electron transport rate (a proxy for ribulose-1,5-bisphosphate

843 regeneration)

844 N Nitrogen

845 N<sub>a</sub> Area-based foliar Nitrogen

846 N<sub>m</sub> Mass-based foliar Nitrogen

847 Q photon flux density

848 RH relative humidity

849 T temperature

850 T<sub>air</sub> Air temperature

851 T<sub>leaf</sub> Leaf temperature

852 SE Standard error of the mean

853 V<sub>cmax</sub> Maximal carboxylation rate of Rubisco

- 854  $D$  vapour pressure deficit of the atmosphere
- 855  $\delta^{13}\text{C}$  ratio of  $^{13}\text{C}$  to  $^{12}\text{C}$  stable carbon isotopes
- 856  $\delta^{15}\text{N}$  ratio of  $^{15}\text{N}$  to  $^{14}\text{N}$  stable carbon isotopes

1 Table 1. Linear mixed-effects model analysis for photosynthesis with CO<sub>2</sub> treatment (CO<sub>2</sub>) using the  
2 diurnal dataset, sampling month (Month) and sampling year (Year) as fixed factors and random  
3 effects of 'plot' and 'time'. Type III sums of squares computed using restricted maximum likelihood  
4 estimates for *F*-tests. The numerator degrees of freedom (df) for each *F*-test are shown. A post-hoc  
5 Tukey test was used to determine the significance relationships. Significance of CO<sub>2</sub> treatment is  
6 noted in the rightmost column as (\* = P < 0.05).

7

| 8  | <b>Parameter</b>                     | <b>DF</b> | <b>P-value</b> |
|----|--------------------------------------|-----------|----------------|
| 9  | <b>CO<sub>2</sub></b>                | 1         | <b>0.044*</b>  |
| 10 | <b>Month</b>                         | 3         | 0.14           |
| 11 | <b>Year</b>                          | 1         | 0.31           |
| 12 | <b>CO<sub>2</sub> * Month</b>        | 3         | 0.18           |
| 13 | <b>CO<sub>2</sub> * Year</b>         | 1         | 0.18           |
| 14 | <b>Month * Year</b>                  | 3         | 0.43           |
| 15 | <b>CO<sub>2</sub> * Month * Year</b> | 3         | 0.079          |

16

17

1 Table 2. Linear mixed-effects model parameters for prediction of  $A_{net}$  with variation in photo flux  
2 density ( $Q$ ). Type III sums of squares computed using restricted maximum likelihood estimates for  $F$ -  
3 tests. The numerator degrees of freedom (DF) for each  $F$ -test are shown. A post-hoc Tukey's test was  
4 used to determine the significance relationships. Significance is noted in the rightmost column as  
5 (\*\*\*) =  $P < 0.001$ ; \*\* =  $P < 0.01$ ; \* =  $P < 0.05$ )

6

7

8

9

10

11

12

13

14

15

16

17

| Parameter         | DF | P-value   |
|-------------------|----|-----------|
| $CO_2$            | 1  | 0.016*    |
| Year              | 1  | 0.062     |
| $Q$               | 3  | <0.001*** |
| $CO_2 * Year$     | 1  | 0.97      |
| $CO_2 * Q$        | 3  | 0.011*    |
| Year * $Q$        | 3  | 0.0078**  |
| $CO_2 * Year * Q$ | 3  | 0.13      |

1 Table 3. Linear mixed-effects model analysis for  $V_{\text{cmax}}$ ,  $J_{\text{max}}$ , net photosynthesis ( $A_{\text{net}}$ ), area-based leaf  
2 nitrogen ( $N_a$ ) and mass-based leaf nitrogen ( $N_m$ ) with  $\text{CO}_2$  treatment ( $\text{CO}_2$ ) and sampling month  
3 (Month) as fixed factors and random effects of 'plot' and 'time'. Type III sums of squares computed  
4 using restricted maximum likelihood estimates for  $F$ -tests. The numerator degrees of freedom (DF)  
5 for each  $F$ -test are shown. Significance is noted in boldface as (\*  $P < 0.05$ )

| Parameter                               | $V_{\text{cmax}}$ | $J_{\text{max}}$ | $A_{\text{net}}$ | $N_m$         | $N_a$       |       |
|-----------------------------------------|-------------------|------------------|------------------|---------------|-------------|-------|
|                                         | DF                | $P$ - value      | $P$ - value      | $P$ - value   | $P$ - value |       |
| <b><math>\text{CO}_2</math></b>         | 1                 | 0.70             | 0.37             | <b>0.042*</b> | 0.42        | 0.64  |
| <b>Month</b>                            | 3                 | <b>0.02*</b>     | 0.15             | <b>0.034*</b> | 0.93        | 0.052 |
| <b><math>\text{CO}_2</math> * Month</b> | 3                 | 0.20             | 0.57             | 0.33          | 0.69        | 0.11  |

6  
7  
8  
9  
10  
11  
12  
13  
14

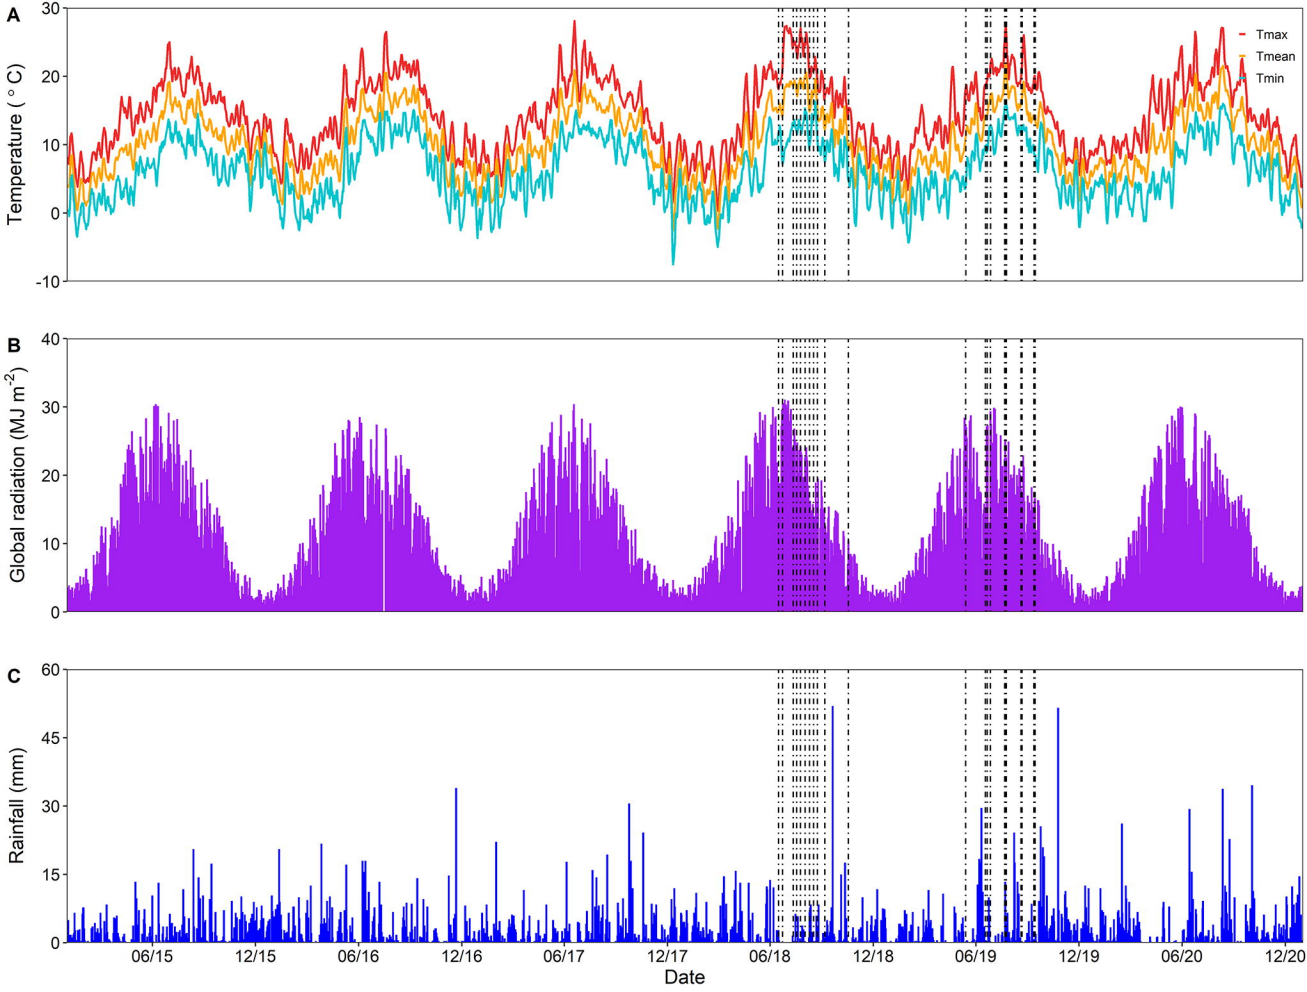

A

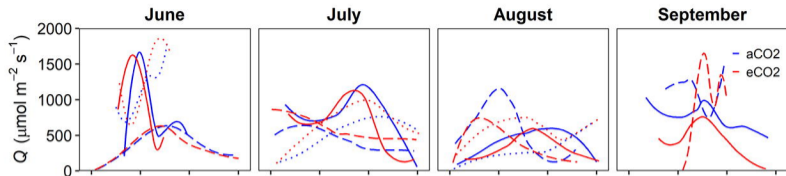

B

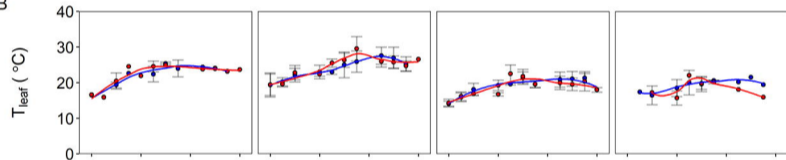

C

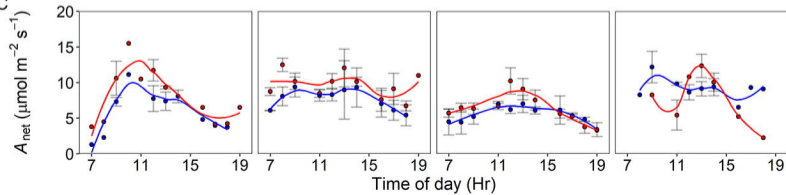

A

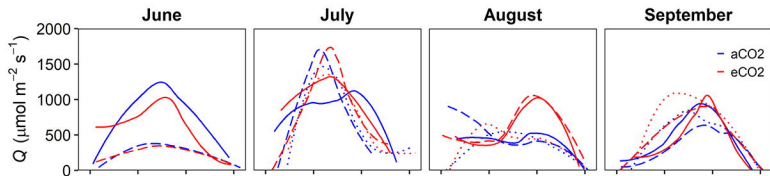

B

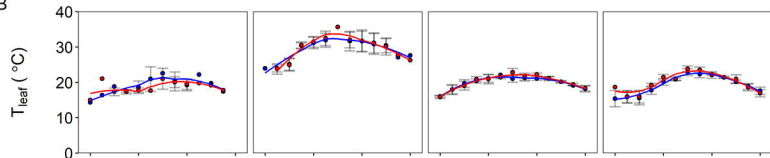

C

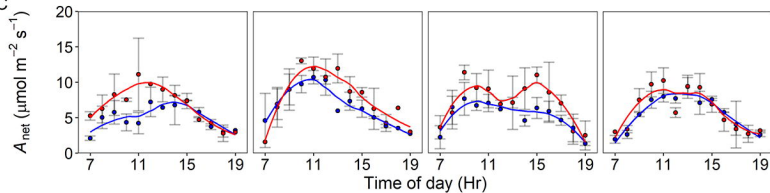



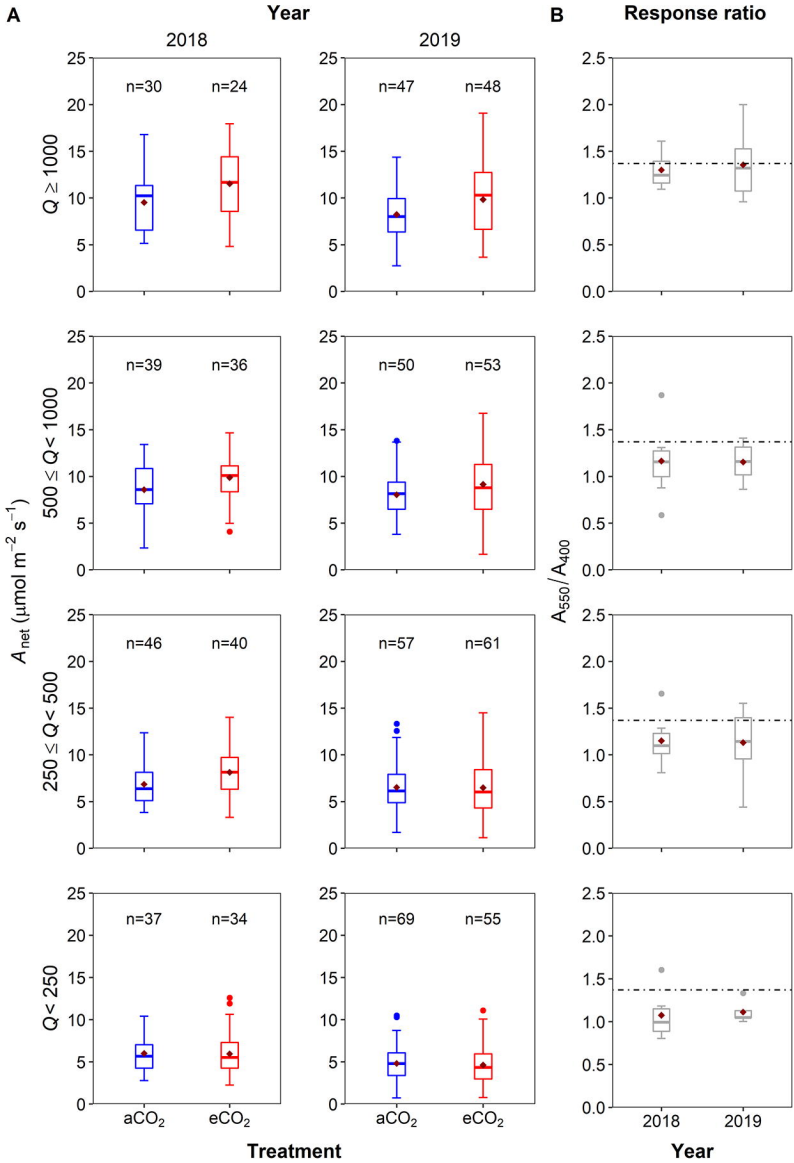

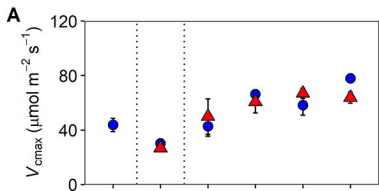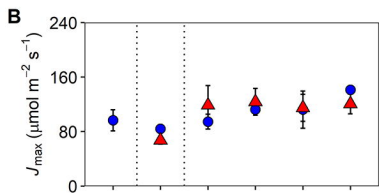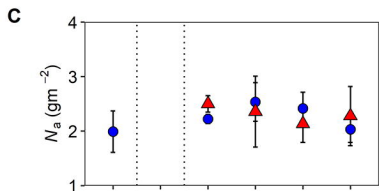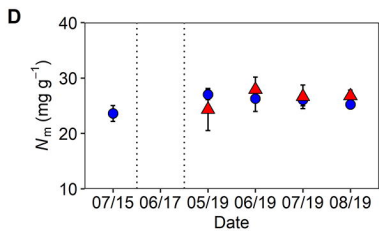

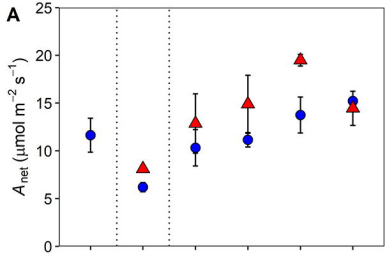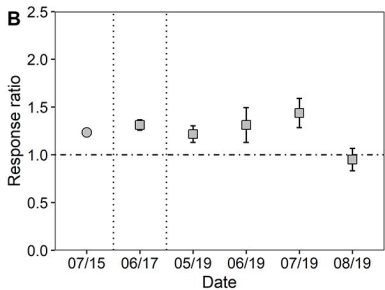

Source: https://www.biorxiv.org/content/10.1101/2020.12.16.416255v2.full.pdf
